# Supplementary material for: Antimicrobial Activities of Aztreonam-Avibactam and Comparator Agents against Enterobacterales Analyzed by ICU and Non-ICU Wards, Infection Sources, and Geographic Regions: ATLAS Program 2016–2020
Source: MDPI journal article supplement (doi:10.3390/antibiotics12111591), 2023-11-03
Supplement: s1 [file s1]

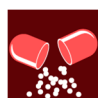**Table S1.** Species distribution of Enterobacterales isolates collected globally stratified by wards and infection sources, 2016–2020.

|                                          |                  | Wards          |                  |                  | Infection sources |                |                |                |                |
|------------------------------------------|------------------|----------------|------------------|------------------|-------------------|----------------|----------------|----------------|----------------|
|                                          |                  | n (%)          |                  |                  | n (%)             |                |                |                |                |
|                                          | n <sup>a,b</sup> | ICU<br>n (%)   | Non-ICU<br>n (%) | n <sup>a,c</sup> | RTI<br>n (%)      | UTI<br>n (%)   | SSTI<br>n (%)  | BSI<br>n (%)   | IAI<br>n (%)   |
| Enterobacterales (N=116602) <sup>d</sup> |                  |                |                  |                  |                   |                |                |                |                |
| <i>Citrobacter amalonaticus</i>          | 104              | 19<br>(18.3)   | 78<br>(75.0)     | 109              | 7<br>(6.4)        | 23<br>(21.1)   | 32<br>(29.4)   | 12<br>(11.0)   | 35<br>(32.1)   |
| <i>Citrobacter braakii</i>               | 328              | 53<br>(16.2)   | 247<br>(75.3)    | 339              | 53<br>(15.6)      | 62<br>(18.3)   | 87<br>(25.7)   | 42<br>(12.4)   | 95<br>(28)     |
| <i>Citrobacter koseri</i>                | 2552             | 499<br>(19.6)  | 1663<br>(65.2)   | 2797             | 592<br>(21.2)     | 1027<br>(36.7) | 644<br>(23.0)  | 268<br>(9.6)   | 215<br>(7.7)   |
| <i>Citrobacter farmeri</i>               | 57               | 7<br>(12.3)    | 48<br>(84.2)     | 62               | 2<br>(3.2)        | 23<br>(37.1)   | 12<br>(19.4)   | 2<br>(3.2)     | 23<br>(37.1)   |
| <i>Citrobacter freundii</i>              | 3343             | 635<br>(19)    | 2315<br>(69.2)   | 3603             | 610<br>(16.9)     | 1164<br>(32.3) | 742<br>(20.6)  | 388<br>(10.8)  | 681<br>(18.9)  |
| <i>Citrobacter</i> spp.                  | 37               | 10<br>(27.0)   | 22<br>(59.5)     | 43               | 9<br>(20.9)       | 10<br>(23.3)   | 9<br>(20.9)    | 6<br>(14.0)    | 9<br>(20.9)    |
| <i>Enterobacter asburiae</i>             | 926              | 259<br>(28.0)  | 571<br>(61.7)    | 981              | 296<br>(30.2)     | 150<br>(15.3)  | 160<br>(16.3)  | 204<br>(20.8)  | 150<br>(15.3)  |
| <i>Enterobacter bugandensis</i>          | 290              | 86<br>(29.7)   | 173<br>(59.7)    | 313              | 99<br>(31.6)      | 29<br>(9.3)    | 62<br>(19.8)   | 73<br>(23.3)   | 49<br>(15.7)   |
| <i>Enterobacter cloacae</i>              | 10554            | 2675<br>(25.3) | 6778<br>(64.2)   | 11295            | 2779<br>(24.6)    | 1798<br>(15.9) | 3031<br>(26.8) | 1947<br>(17.2) | 1535<br>(13.6) |
| <i>Enterobacter hormaechi</i>            | 49               | 10<br>(20.4)   | 35<br>(71.4)     | 53               | 17<br>(32.1)      | 7<br>(13.2)    | 9<br>(17.0)    | 8<br>(15.1)    | 12<br>(22.6)   |
| <i>Enterobacter kobei</i>                | 409              | 101<br>(24.7)  | 258<br>(63.1)    | 435              | 113<br>(26.0)     | 75<br>(17.2)   | 71<br>(16.3)   | 92<br>(21.1)   | 75<br>(17.2)   |
| <i>Enterobacter ludwigii</i>             | 129              | 33<br>(25.6)   | 86<br>(66.7)     | 137              | 30<br>(21.9)      | 10<br>(7.3)    | 31<br>(22.6)   | 19<br>(13.9)   | 44<br>(32.1)   |
| <i>Enterobacter xiangfangensis</i>       | 173              | 51<br>(29.5)   | 111<br>(64.2)    | 179              | 54<br>(30.2)      | 24<br>(13.4)   | 54<br>(30.2)   | 26<br>(14.5)   | 21<br>(11.7)   |
| <i>Escherichia coli</i>                  | 33446            | 5911<br>(17.7) | 22353<br>(66.8)  | 35544            | 4181<br>(11.8)    | 9052<br>(25.5) | 5958<br>(16.8) | 8945<br>(25.2) | 7199<br>(20.3) |
| <i>Klebsiella aerogenes</i>              | 4190             | 1214<br>(29.0) | 2469<br>(58.9)   | 4501             | 1541<br>(34.2)    | 990<br>(22.0)  | 735<br>(16.3)  | 670<br>(14.9)  | 473<br>(10.5)  |
| <i>Klebsiella pneumoniae</i>             | 29601            | 8368<br>(28.3) | 17868<br>(60.4)  | 31320            | 9190<br>(29.3)    | 7063<br>(22.6) | 4347<br>(13.9) | 6817<br>(21.8) | 3677<br>(11.7) |
| <i>Klebsiella oxytoca</i>                | 4928             | 1265<br>(25.7) | 3083<br>(62.6)   | 5286             | 1503<br>(28.4)    | 979<br>(18.5)  | 1016<br>(19.2) | 938<br>(17.7)  | 785<br>(14.9)  |
| <i>Klebsiella variicola</i>              | 1706             | 389<br>(22.8)  | 1096<br>(64.2)   | 1802             | 503<br>(27.9)     | 348<br>(19.3)  | 203<br>(11.3)  | 440<br>(24.4)  | 293<br>(16.3)  |
| <i>Morganella morganii</i>               | 2676             | 447<br>(16.7)  | 1942<br>(72.57)  | 2845             | 377<br>(13.3)     | 848<br>(29.8)  | 938<br>(33.0)  | 331<br>(11.6)  | 351<br>(12.3)  |
| <i>Proteus hauseri</i>                   | 377              | 49<br>(13.0)   | 284<br>(75.3)    | 402              | 38<br>(9.5)       | 129<br>(32.1)  | 170<br>(42.3)  | 25<br>(6.2)    | 40<br>(10.0)   |
| <i>Proteus mirabilis</i>                 | 3919             | 677<br>(17.3)  | 2716<br>(69.3)   | 4194             | 580<br>(13.8)     | 1334<br>(31.8) | 1307<br>(31.2) | 604<br>(14.4)  | 369<br>(8.8)   |
| <i>Proteus vulgaris</i>                  | 1404             | 206            | 1014             | 1479             | 179               | 464            | 551            | 95             | 190            |

|                                   |      |        |        |      |        |        |        |        |        |
|-----------------------------------|------|--------|--------|------|--------|--------|--------|--------|--------|
|                                   |      | (14.7) | (72.2) |      | (12.1) | (31.4) | (37.3) | (6.4)  | (12.8) |
| <i>Providencia alcalifaciens</i>  | 26   | 3      | 17     | 27   | 1      | 13     | 6      | 1      | 6      |
|                                   |      | (11.5) | (65.4) |      | (3.7)  | (48.1) | (22.2) | (3.7)  | (22.2) |
| <i>Providencia rettgeri</i>       | 938  | 130    | 653    | 1003 | 105    | 481    | 263    | 90     | 64     |
|                                   |      | (13.9) | (69.6) |      | (10.5) | (48.0) | (26.2) | (9.0)  | (6.4)  |
| <i>Providencia stuartii</i>       | 1104 | 200    | 726    | 1165 | 195    | 440    | 326    | 163    | 41     |
|                                   |      | (18.1) | (65.8) |      | (16.7) | (37.8) | (28.0) | (14.0) | (3.5)  |
| <i>Providencia spp</i>            | 31   | 7      | 21     | 36   | 7      | 11     | 12     | 2      | 4      |
|                                   |      | (22.6) | (67.7) |      | (19.4) | (30.6) | (33.3) | (5.6)  | (11.1) |
| <i>Raoultella ornithinolytica</i> | 89   | 19     | 63     | 98   | 41     | 16     | 21     | 8      | 12     |
|                                   |      | (21.3) | (70.8) |      | (41.8) | (16.3) | (21.4) | (8.2)  | (12.2) |
| <i>Serratia marcescens</i>        | 5811 | 1770   | 3364   | 6199 | 2473   | 684    | 1243   | 1234   | 425    |
|                                   |      | (30.5) | (57.9) |      | (39.9) | (11.0) | (20.1) | (19.9) | (6.9)  |

<sup>a</sup> Does not include isolates from wards/infection sources for which information was not specified or available. <sup>b</sup> The number of isolates mentioned correspond to ICU, non-ICU and other sources (clinic/office, emergency room, nursing home/rehab). <sup>c</sup> The number of isolates mentioned correspond to RTI, UTI, SSTI, BSI, IAI, and other infection sources (nervous system, the head, ears, eyes, nose, and throat [HEENT], and instruments). <sup>d</sup> Includes *Enterobacter cloacae*, *Enterobacter hormaechi*, *Enterobacter kobei*, *Enterobacter ludwigii*, *Enterobacter asburiae*, *Escherichia coli*, *Klebsiella pneumoniae*, *Klebsiella oxytoca*, *Klebsiella aerogenes*, *Citrobacter koseri*, *Citrobacter freundii*, *Morganella morganii*, *Serratia marcescens*, *Proteus mirabilis*, *Citrobacter amalonaticus*, *Citrobacter braakii*, *Citrobacter farmer*, *Citrobacter spp*, *Enterobacter bugandensis*, *Enterobacter xiangfangensis*, *Klebsiella variicola*, *Proteus hauseri*, *Proteus vulgaris*, *Providencia alcalifaciens*, *Providencia rettgeri*, *Providencia spp*, *Providencia stuartii*, *Raoultella ornithinolytica*. % indicates n (from specific ward or infection source)/total n from wards or infection sources. BSI, blood stream infections; IAI, intra-abdominal infections; ICU, intensive care unit; N, total number of isolates; n, number of isolates from wards/infection sources; NA, not available; RTI, respiratory tract infections; SSTI, skin and soft tissue infection; UTI, urinary tract infections.

**Table S2.** Percentage frequency distribution at MIC ( $\mu\text{g/mL}$ ) for all Enterobacterales collected globally across wards, 2016–2020.

| Cumulative percentage of isolates at each MIC ( $\mu\text{g/mL}$ ) (absolute n at MIC) |                |        |                 |                 |                 |                       |                       |                |               |               |               |                |                |                |                       |                       |               |
|----------------------------------------------------------------------------------------|----------------|--------|-----------------|-----------------|-----------------|-----------------------|-----------------------|----------------|---------------|---------------|---------------|----------------|----------------|----------------|-----------------------|-----------------------|---------------|
| Wards                                                                                  | Anti-microbial | n      | $\leq 0.015$    | 0.03            | 0.06            | 0.12                  | 0.25                  | 0.5            | 1             | 2             | 4             | 8              | 16             | 32             | 64                    | 128                   | $\geq 256$    |
| <b>Enterobacterales<sup>a</sup></b>                                                    |                |        |                 |                 |                 |                       |                       |                |               |               |               |                |                |                |                       |                       |               |
| ICU                                                                                    | ATM            | 20,799 | 5.4<br>(1114)   | 15.4<br>(2085)  | 37.3<br>(4563)  | 53.8<br>(3421)        | 59.7<br>(1232)        | 62.0<br>(472)  | 63.6<br>(333) | 64.8<br>(259) | 66.3<br>(304) | 68.6<br>(480)  | 72.4<br>(798)  | 79.0<br>(1365) | 85.9<br>(1440)        | <b>94.6</b><br>(1813) | 100<br>(1120) |
|                                                                                        | ATM-AVI        | 20,200 | 15.7<br>(3177)  | 43.6<br>(5625)  | 72.6<br>(5869)  | 86.6<br>(2824)        | <b>94.0</b><br>(1497) | 97.3<br>(656)  | 98.5<br>(249) | 99.3<br>(155) | 99.7<br>(94)  | 99.9<br>(24)   | 99.9<br>(17)   | 100<br>(3)     | 100<br>(6)            | 100<br>(4)            |               |
| Non-ICU                                                                                | ATM            | 58,531 | 8.0<br>(4686)   | 19.2<br>(6530)  | 43.8<br>(14432) | 61.5<br>(10349)       | 67.4<br>(3464)        | 69.6<br>(1257) | 71.2<br>(929) | 72.6<br>(830) | 74.3<br>(995) | 76.8<br>(1451) | 80.2<br>(1989) | 86.0<br>(3448) | <b>91.6</b><br>(3241) | 96.7<br>(3017)        | 100<br>(1913) |
|                                                                                        | ATM-AVI        | 56,533 | 21.8<br>(12294) | 51.3<br>(16730) | 79.3<br>(15783) | <b>91.1</b><br>(6710) | 95.9<br>(2672)        | 98.0<br>(1203) | 99.0<br>(546) | 99.5<br>(325) | 99.9<br>(184) | 99.9<br>(45)   | 100<br>(21)    | 100<br>(7)     | 100<br>(9)            | 100<br>(4)            |               |

NOTE: MIC<sub>90</sub> values are in bold, and the boxes have been shaded grey. <sup>a</sup> Includes *Enterobacter cloacae*, *Enterobacter hormaechi*, *Enterobacter kobei*, *Enterobacter ludwigii*, *Enterobacter asburiae*, *Escherichia coli*, *Klebsiella pneumoniae*, *Klebsiella oxytoca*, *Klebsiella aerogenes*, *Citrobacter koseri*, *Citrobacter freundii*, *Morganella morganii*, *Serratia marcescens*, *Proteus mirabilis*, *Citrobacter amalonaticus*, *Citrobacter braakii*, *Citrobacter farmer*, *Citrobacter spp*, *Enterobacter bugandensis*, *Enterobacter xiangfangensis*, *Klebsiella variicola*, *Proteus hauseri*, *Proteus vulgaris*, *Providencia alcalifaciens*, *Providencia rettgeri*, *Providencia spp*, *Providencia stuartii*, and *Raoultella ornithinolytica*. ATM, aztreonam; ATM-AVI, aztreonam/avibactam; ICU, intensive care unit; MIC, minimum inhibitory concentration; n, number of isolates from wards.

**Table S3.** *In vitro* activity of ATM-AVI and comparator agents tested against multi-drug resistant (MDR) Enterobacterales isolates across regions stratified by wards from 2016–2020.

|                                                              | ICU            |                                       |                |                                                    | Non-ICU        |                                       |                |                                                    |
|--------------------------------------------------------------|----------------|---------------------------------------|----------------|----------------------------------------------------|----------------|---------------------------------------|----------------|----------------------------------------------------|
|                                                              | CLSI           |                                       | EUCAST         |                                                    | CLSI           |                                       | EUCAST         |                                                    |
|                                                              | n <sup>a</sup> | MIC <sub>90</sub><br>(µg/mL)<br>(% S) | n <sup>a</sup> | MIC <sub>90</sub><br>(mg/L)<br>(% S <sup>b</sup> ) | n <sup>a</sup> | MIC <sub>90</sub><br>(µg/mL)<br>(% S) | n <sup>a</sup> | MIC <sub>90</sub><br>(mg/L)<br>(% S <sup>b</sup> ) |
| <b>Africa-Middle East<br/>(CLSI/EUCAST,<br/>N=3627/3935)</b> |                |                                       |                |                                                    |                |                                       |                |                                                    |
| Aztreonam-avibactam <sup>c</sup>                             | 783            | 0.25 (100)                            | 840            | 0.25 (100)                                         | 2255           | 0.25 (99.8)                           | 2446           | 0.25 (99.8)                                        |
| Aztreonam                                                    | 783            | 128 (21.5)                            | 840            | 128 (25.7)                                         | 2255           | 128 (26.7)                            | 2446           | 128 (31.6)                                         |
| Amikacin                                                     | 805            | 16 (91.2)                             | 869            | 16 (86.1)                                          | 2298           | 8 (94.6)                              | 2501           | 8 (90.4)                                           |
| Cefepime                                                     | 805            | 64 (24.1)                             | 869            | 64 (33.3)                                          | 2298           | 64 (27.7)                             | 2501           | 64 (37.9)                                          |
| Ceftazidime                                                  | 805            | 128 (20.5)                            | 869            | 128 (24.3)                                         | 2298           | 128 (27.6)                            | 2501           | 128 (32.0)                                         |
| Ceftazidime-avibactam                                        | 783            | 1 (92.5)                              | 840            | 1 (93.0)                                           | 2255           | 1 (94.9)                              | 2446           | 1 (95.3)                                           |
| Ceftriaxone                                                  | 184            | 64 (6.0)                              | 203            | 64 (11.3)                                          | 587            | 32 (7.2)                              | 651            | 32 (14.1)                                          |
| Ciprofloxacin                                                | 621            | 8 (22.5)                              | 666            | 8 (36.2)                                           | 1711           | 8 (19.7)                              | 1850           | 8 (30.4)                                           |
| Colistin <sup>d,e</sup>                                      | 726            | 1 (NA)                                | 776            | 1 (96.3)                                           | 2015           | 1 (NA)                                | 2186           | 1 (97.4)                                           |
| Gentamicin                                                   | 621            | 32 (49.3)                             | 666            | 32 (51.1)                                          | 1711           | 32 (50.0)                             | 1850           | 32 (51.1)                                          |
| Imipenem <sup>f</sup>                                        | 783            | 8 (75.9)                              | 840            | 8 (NA)                                             | 2255           | 4 (80.7)                              | 2446           | 4 (NA)                                             |
| Levofloxacin                                                 | 805            | 16 (39.6)                             | 869            | 16 (55.6)                                          | 2298           | 16 (30.8)                             | 2501           | 16 (44.9)                                          |
| Meropenem                                                    | 805            | 16 (83.4)                             | 869            | 16 (89.8)                                          | 2298           | 1 (91.0)                              | 2501           | 0.5 (95.2)                                         |
| Piperacillin/tazobactam                                      | 805            | 128 (46.8)                            | 869            | 128 (48.7)                                         | 2298           | 128 (54.9)                            | 2501           | 128 (56.4)                                         |
| Tigecycline <sup>g,h,i</sup>                                 | 765            | 1 (96.9)                              | 826            | 1 (96.7)                                           | 2071           | 1 (97.4)                              | 2258           | 1 (96.3)                                           |
| <b>Asia-Pacific<br/>(CLSI/EUCAST,<br/>N=8781/9441)</b>       |                |                                       |                |                                                    |                |                                       |                |                                                    |
| Aztreonam-avibactam <sup>c</sup>                             | 1591           | 1 (98.5)                              | 1668           | 1 (98.6)                                           | 4405           | 0.5 (99.6)                            | 4723           | 0.5 (99.6)                                         |
| Aztreonam                                                    | 1975           | 256 (16.6)                            | 2072           | 256 (19.9)                                         | 5440           | 256 (27.2)                            | 5845           | 256 (31.1)                                         |
| Amikacin                                                     | 2029           | 128 (72.8)                            | 2135           | 128 (70.5)                                         | 5605           | 64 (89)                               | 6044           | 32 (86.2)                                          |
| Cefepime                                                     | 2029           | 64 (21.3)                             | 2135           | 64 (29.2)                                          | 5605           | 64 (33.4)                             | 6044           | 64 (42.5)                                          |
| Ceftazidime                                                  | 2029           | 256 (16)                              | 2135           | 256 (18.7)                                         | 5605           | 256 (29.6)                            | 6044           | 256 (33.3)                                         |
| Ceftazidime-avibactam                                        | 1975           | 128 (81.0)                            | 2072           | 128 (81.8)                                         | 5440           | 4 (91.6)                              | 5845           | 2 (92.2)                                           |
| Ceftriaxone                                                  | 430            | 64 (5.4)                              | 467            | 64 (12.4)                                          | 1726           | 32 (6.5)                              | 1891           | 32 (11.4)                                          |
| Ciprofloxacin                                                | 1599           | 8 (15.4)                              | 1668           | 8 (22.9)                                           | 3879           | 8 (20.0)                              | 4153           | 8 (29.1)                                           |
| Colistin <sup>d,e</sup>                                      | 1787           | 1 (NA)                                | 1876           | 1 (92.6)                                           | 4891           | 1 (NA)                                | 5273           | 1 (94.7)                                           |
| Gentamicin                                                   | 1599           | 32 (45.2)                             | 1668           | 32 (46)                                            | 3879           | 32 (55.1)                             | 4153           | 32 (55.7)                                          |
| Imipenem <sup>f</sup>                                        | 1975           | 16 (60.7)                             | 2072           | 16 (0)                                             | 5440           | 16 (76.1)                             | 5845           | 16 (NA)                                            |
| Levofloxacin                                                 | 2029           | 16 (22.4)                             | 2135           | 16 (32.3)                                          | 5605           | 16 (26.0)                             | 6044           | 16 (36.4)                                          |
| Meropenem                                                    | 2029           | 32 (67)                               | 2135           | 32 (71.8)                                          | 5605           | 16 (84.4)                             | 6044           | 16 (87.7)                                          |
| Piperacillin/tazobactam                                      | 2029           | 128 (38.6)                            | 2135           | 128 (40.0)                                         | 5605           | 128 (54.6)                            | 6044           | 128 (56.3)                                         |
| Tigecycline <sup>g,h,i</sup>                                 | 1880           | 2 (94.6)                              | 1981           | 2 (94.2)                                           | 5130           | 2 (96.3)                              | 5549           | 2 (93.5)                                           |
| <b>Europe<br/>(CLSI/EUCAST,<br/>N=14785/16435)</b>           |                |                                       |                |                                                    |                |                                       |                |                                                    |
| Aztreonam-avibactam <sup>c</sup>                             | 3807           | 0.5 (99.9)                            | 4088           | 0.5 (99.9)                                         | 8026           | 0.5 (99.9)                            | 8837           | 0.5 (99.9)                                         |
| Aztreonam                                                    | 3807           | 256 (22.4)                            | 4088           | 256 (26.7)                                         | 8026           | 128 (29.3)                            | 8837           | 128 (34.6)                                         |
| Amikacin                                                     | 4126           | 32 (87.4)                             | 4473           | 32 (82.4)                                          | 8606           | 16 (91.5)                             | 9583           | 16 (87.4)                                          |
| Cefepime                                                     | 4126           | 64 (31.0)                             | 4473           | 64 (39.9)                                          | 8606           | 64 (37.4)                             | 9583           | 64 (47.2)                                          |
| Ceftazidime                                                  | 4126           | 256 (23.8)                            | 4473           | 256 (27.6)                                         | 8606           | 256 (30.1)                            | 9583           | 256 (35)                                           |

|                                                         |      |            |      |            |      |             |      |             |
|---------------------------------------------------------|------|------------|------|------------|------|-------------|------|-------------|
| Ceftazidime-avibactam                                   | 3807 | 2 (93.6)   | 4088 | 2 (94.1)   | 8026 | 2 (96.2)    | 8837 | 1 (96.5)    |
| Ceftriaxone                                             | 1429 | 64 (9.5)   | 1595 | 64 (15.1)  | 3111 | 64 (10.9)   | 3586 | 64 (18.3)   |
| Ciprofloxacin                                           | 2697 | 8 (29.6)   | 2878 | 8 (37.0)   | 5495 | 8 (28.1)    | 5997 | 8 (36.2)    |
| Colistin <sup>d,e</sup>                                 | 3495 | 1 (NA)     | 3753 | 1 (92.3)   | 7197 | 1 (NA)      | 7937 | 1 (95.7)    |
| Gentamicin                                              | 2697 | 32 (54.8)  | 2878 | 32 (55.9)  | 5495 | 32 (61.6)   | 5997 | 32 (62.4)   |
| Imipenem <sup>f</sup>                                   | 3807 | 16 (72.0)  | 4088 | 16 (NA)    | 8026 | 8 (76.6)    | 8837 | 8 (NA)      |
| Levofloxacin                                            | 4126 | 16 (34.1)  | 4473 | 16 (45.3)  | 8606 | 16 (33.6)   | 9583 | 16 (43.8)   |
| Meropenem                                               | 4126 | 16 (77.3)  | 4473 | 16 (85.8)  | 8606 | 8 (85.1)    | 9583 | 4 (91.7)    |
| Piperacillin/tazobactam                                 | 4126 | 256 (30.3) | 4473 | 256 (32.8) | 8606 | 256 (41.6)  | 9583 | 256 (43.8)  |
| Tigecycline <sup>g,h,i</sup>                            | 3872 | 2 (96.4)   | 4198 | 2 (96.8)   | 7850 | 1 (96.6)    | 8757 | 1 (96.7)    |
| <b>Latin America<br/>(CLSI/EUCAST,<br/>N=6640/7083)</b> |      |            |      |            |      |             |      |             |
| Aztreonam-avibactam <sup>c</sup>                        | 1638 | 0.25 (100) | 1715 | 0.25 (100) | 3451 | 0.25 (99.9) | 3640 | 0.25 (99.9) |
| Aztreonam                                               | 1638 | 256 (18.0) | 1715 | 256 (20.4) | 3451 | 128 (24.2)  | 3640 | 128 (27.4)  |
| Amikacin                                                | 1736 | 32 (85.8)  | 1825 | 32 (79.1)  | 3675 | 16 (91.4)   | 3923 | 16 (85.9)   |
| Cefepime                                                | 1736 | 64 (22.6)  | 1825 | 64 (30.3)  | 3675 | 64 (26.4)   | 3923 | 64 (34.2)   |
| Ceftazidime                                             | 1736 | 256 (19.1) | 1825 | 256 (21.3) | 3675 | 128 (26.3)  | 3923 | 128 (29.2)  |
| Ceftazidime-avibactam                                   | 1638 | 2 (92.9)   | 1715 | 2 (93.2)   | 3451 | 2 (95.4)    | 3640 | 1 (95.7)    |
| Ceftriaxone                                             | 579  | 64 (5.5)   | 619  | 64 (8.9)   | 1387 | 64 (6.4)    | 1514 | 64 (9.8)    |
| Ciprofloxacin                                           | 1157 | 8 (19.4)   | 1206 | 8 (27.3)   | 2288 | 8 (18.4)    | 2409 | 8 (25.5)    |
| Colistin <sup>d,e</sup>                                 | 1504 | 1 (NA)     | 1582 | 1 (92.5)   | 3143 | 1 (NA)      | 3314 | 1 (94.8)    |
| Gentamicin                                              | 1157 | 32 (45.8)  | 1206 | 32 (46.1)  | 2288 | 32 (50.2)   | 2409 | 32 (50.6)   |
| Imipenem <sup>f</sup>                                   | 1638 | 16 (69.6)  | 1715 | 16 (NA)    | 3451 | 8 (77.6)    | 3640 | 8 (NA)      |
| Levofloxacin                                            | 1736 | 16 (29.5)  | 1825 | 16 (41.9)  | 3675 | 16 (25.5)   | 3923 | 16 (35.7)   |
| Meropenem                                               | 1736 | 32 (73.3)  | 1825 | 32 (81.8)  | 3675 | 16 (83.3)   | 3923 | 16 (89.9)   |
| Piperacillin/tazobactam                                 | 1736 | 256 (37.4) | 1825 | 256 (38.9) | 3675 | 256 (48.7)  | 3923 | 128 (49.6)  |
| Tigecycline <sup>g,h,i</sup>                            | 1647 | 2 (96.7)   | 1739 | 2 (98.5)   | 3414 | 1 (97.4)    | 3649 | 1 (96.8)    |
| <b>North America<br/>(CLSI/EUCAST,<br/>N=2472/2806)</b> |      |            |      |            |      |             |      |             |
| Aztreonam-avibactam <sup>c</sup>                        | 470  | 0.5 (99.8) | 517  | 0.5 (99.8) | 1427 | 0.5 (99.7)  | 1612 | 0.5 (99.7)  |
| Aztreonam                                               | 470  | 128 (25.3) | 517  | 128 (31.1) | 1427 | 128 (38.5)  | 1612 | 128 (44.5)  |
| Amikacin                                                | 506  | 8 (95.9)   | 555  | 8 (90.5)   | 1507 | 8 (97.8)    | 1720 | 8 (94.4)    |
| Cefepime                                                | 506  | 64 (43.7)  | 555  | 64 (56.6)  | 1507 | 64 (54.7)   | 1720 | 64 (64.8)   |
| Ceftazidime                                             | 506  | 128 (29.5) | 555  | 128 (34.4) | 1507 | 128 (38.3)  | 1720 | 128 (43.7)  |
| Ceftazidime-avibactam                                   | 470  | 1 (98.9)   | 517  | 1 (99.0)   | 1428 | 1 (98.5)    | 1613 | 1 (98.8)    |
| Ceftriaxone                                             | 108  | 64 (12.0)  | 121  | 64 (17.4)  | 243  | 64 (11.5)   | 308  | 64 (21.4)   |
| Ciprofloxacin                                           | 398  | 8 (36.9)   | 434  | 8 (46.8)   | 1264 | 8 (36.4)    | 1412 | 8 (43.9)    |
| Colistin <sup>d,e</sup>                                 | 435  | 1 (NA)     | 475  | 1 (96.6)   | 1259 | 1 (NA)      | 1432 | 1 (95.2)    |
| Gentamicin                                              | 398  | 32 (71.9)  | 434  | 32 (71.2)  | 1264 | 32 (70.2)   | 1412 | 32 (70.4)   |
| Imipenem <sup>f</sup>                                   | 470  | 2 (85.7)   | 517  | 2 (NA)     | 1428 | 4 (82.1)    | 1613 | 2 (NA)      |
| Levofloxacin                                            | 506  | 16 (42.9)  | 555  | 16 (51.9)  | 1507 | 16 (40.8)   | 1720 | 16 (49.4)   |
| Meropenem                                               | 506  | 1 (90.9)   | 555  | 0.5 (96.6) | 1507 | 0.5 (92.6)  | 1720 | 0.25 (96.9) |
| Piperacillin/tazobactam                                 | 506  | 128 (41.5) | 555  | 128 (44.9) | 1507 | 128 (53.2)  | 1720 | 128 (55.4)  |
| Tigecycline <sup>g,h,i</sup>                            | 483  | 1 (95.5)   | 526  | 1 (97.6)   | 1356 | 1 (96.8)    | 1561 | 1 (97.2)    |

<sup>a</sup> Not all drugs in the panel were tested every year. <sup>b</sup> Data includes percentage isolates susceptible at increased exposure. <sup>c</sup> No breakpoints available from CLSI and EUCAST. Values expressed are indicative of the cumulative percentage of isolates inhibited at  $\leq 8$  mg/L for comparison purposes. <sup>d</sup> Susceptible category for colistin not available for CLSI breakpoints (only intermediate and resistant isolates are available). <sup>e</sup> Data for colistin do not include isolates of *Morganella morganii*, *Proteus hauseri*, *Proteus mirabilis*, *Proteus vulgaris*, *Providencia alcalifaciens*, *Providencia rettgeri*, *Providencia* spp.

*Providencia stuartii*, and *Serratia marcescens* because of their intrinsic resistance. <sup>f</sup> Data for imipenem not available per EUCAST. <sup>g</sup> Data for tigecycline do not include isolates of *Morganella morganii*, *Proteus hauseri*, *Proteus mirabilis*, *Proteus vulgaris*, *Providencia alcalifaciens*, *Providencia rettgeri*, *Providencia* spp, and *Providencia stuartii* due to their intrinsic resistance. <sup>h</sup> Data for tigecycline was calculated based on FDA approved breakpoints for CLSI. <sup>i</sup> EUCAST data for susceptibility to tigecycline are limited to *E. coli* and *C. koseri*; denominator (n): AfME: ICU= 239, non-ICU= 995; APAC: ICU= 694, non-ICU= 2885; Europe: ICU= 1104, non-ICU= 3343; LATAM: ICU= 469, non-ICU= 1627; North America: ICU= 207, non-ICU= 774. ICU, intensive care unit; MIC, minimum inhibitory concentration; N, total number of isolates; n, number of isolates from wards; NA, not available.

**Table S4.** *In vitro* activity of ATM-AVI and comparator agents tested against multi-drug resistant (MDR) Enterobacterales isolates across regions stratified by infection sources from 2016-2020.

|                                                              | RTI               |                   |                   |                               | UTI               |                  |                   |                               | SSTI              |                  |                   |                               |
|--------------------------------------------------------------|-------------------|-------------------|-------------------|-------------------------------|-------------------|------------------|-------------------|-------------------------------|-------------------|------------------|-------------------|-------------------------------|
|                                                              | CLSI              |                   | EUCAST            |                               | CLSI              |                  | EUCAST            |                               | CLSI              |                  | EUCAST            |                               |
|                                                              | MIC <sub>90</sub> |                   | MIC <sub>90</sub> |                               | MIC <sub>90</sub> |                  | MIC <sub>90</sub> |                               | MIC <sub>90</sub> |                  | MIC <sub>90</sub> |                               |
|                                                              | n <sup>a</sup>    | (µg/mL)/<br>(% S) | n <sup>a</sup>    | (mg/L)<br>(% S <sup>b</sup> ) | n <sup>a</sup>    | (µg/mL)<br>(% S) | n <sup>a</sup>    | (mg/L)<br>(% S <sup>b</sup> ) | n <sup>a</sup>    | (µg/mL)<br>(% S) | n <sup>a</sup>    | (mg/L)<br>(% S <sup>b</sup> ) |
| <b>Africa-Middle East<br/>(CLSI/EUCAST,<br/>N=3627/3935)</b> |                   |                   |                   |                               |                   |                  |                   |                               |                   |                  |                   |                               |
| Aztreonam-avibactam <sup>c</sup>                             | 565               | 0.25 (100)        | 613               | 0.25 (100)                    | 987               | 0.25 (99.8)      | 1047              | 0.25 (99.8)                   | 835               | 0.25 (99.9)      | 919               | 0.25 (99.9)                   |
| Aztreonam                                                    | 565               | 128 (21.2)        | 613               | 128 (26.3)                    | 987               | 128 (27.9)       | 1047              | 128 (31.5)                    | 835               | 128 (27.2)       | 919               | 128 (33.0)                    |
| Amikacin                                                     | 576               | 16 (91.8)         | 626               | 16 (88.5)                     | 1010              | 8 (95.5)         | 1072              | 8 (91.0)                      | 852               | 16 (94.0)        | 946               | 16 (89.0)                     |
| Cefepime                                                     | 576               | 64 (21.9)         | 626               | 64 (32.4)                     | 1010              | 64 (27.7)        | 1072              | 64 (36.9)                     | 852               | 64 (28.9)        | 946               | 64 (39.2)                     |
| Ceftazidime                                                  | 576               | 128 (22.9)        | 626               | 128 (28.3)                    | 1010              | 128 (28.8)       | 1072              | 128 (31.7)                    | 852               | 128 (27.9)       | 946               | 128 (32.6)                    |
| Ceftazidime-avibactam                                        | 565               | 1 (95.6)          | 613               | 1 (95.9)                      | 987               | 1 (93.4)         | 1047              | 1 (93.8)                      | 835               | 1 (95.0)         | 919               | 1 (95.4)                      |
| Ceftriaxone                                                  | 191               | 32 (7.9)          | 207               | 32 (11.6)                     | 222               | 32 (5.4)         | 244               | 32 (12.7)                     | 251               | 32 (5.6)         | 287               | 32 (14.3)                     |
| Ciprofloxacin                                                | 385               | 8 (19.5)          | 419               | 8 (32.0)                      | 788               | 8 (19.0)         | 828               | 8 (27.2)                      | 601               | 8 (19.5)         | 659               | 8 (32.3)                      |
| Colistin <sup>d,e</sup>                                      | 507               | 1 (NA)            | 549               | 1 (97.1)                      | 887               | 1 (NA)           | 948               | 1 (97.2)                      | 717               | 1 (NA)           | 786               | 1 (96.7)                      |
| Gentamicin                                                   | 385               | 32 (51.2)         | 419               | 32 (51.6)                     | 788               | 32 (48)          | 828               | 32 (48.9)                     | 601               | 32 (47.8)        | 659               | 32 (49.2)                     |
| Imipenem <sup>f</sup>                                        | 565               | 4 (77.9)          | 613               | 4 (NA)                        | 987               | 4 (82.3)         | 1047              | 4 (NA)                        | 835               | 4 (79.0)         | 919               | 4 (NA)                        |
| Levofloxacin                                                 | 576               | 16 (35.1)         | 626               | 16 (53.5)                     | 1010              | 16 (30.8)        | 1072              | 16 (40.4)                     | 852               | 16 (29.8)        | 946               | 16 (46.5)                     |
| Meropenem                                                    | 576               | 8 (86.5)          | 626               | 4 (91.4)                      | 1010              | 1 (91.2)         | 1072              | 0.5 (95.2)                    | 852               | 1 (91.3)         | 946               | 0.5 (95.4)                    |
| Piperacillin/tazobactam                                      | 576               | 128 (48.8)        | 626               | 128 (49.7)                    | 1010              | 128 (55.2)       | 1072              | 128 (56.7)                    | 852               | 128 (57.2)       | 946               | 128 (58.9)                    |
| Tigecycline <sup>g,h,i</sup>                                 | 527               | 2 (95.5)          | 573               | 2 (94.9)                      | 917               | 1 (98.4)         | 981               | 1 (97.2)                      | 740               | 1 (97.3)         | 821               | 1 (94.7)                      |
| <b>Asia-Pacific<br/>(CLSI/EUCAST,<br/>N=8781/9441)</b>       |                   |                   |                   |                               |                   |                  |                   |                               |                   |                  |                   |                               |
| Aztreonam-avibactam <sup>c</sup>                             | 1661              | 0.5 (99.2)        | 1763              | 0.5 (99.2)                    | 1879              | 0.5 (99.4)       | 2014              | 0.5 (99.5)                    | 1021              | 0.5 (99.3)       | 1100              | 0.5 (99.4)                    |
| Aztreonam                                                    | 2052              | 256 (18.0)        | 2178              | 256 (21.8)                    | 2299              | 256 (30.0)       | 2466              | 256 (33.4)                    | 1203              | 256 (29.8)       | 1298              | 256 (34.0)                    |
| Amikacin                                                     | 2127              | 128 (80.2)        | 2264              | 128 (78)                      | 2354              | 128 (85.1)       | 2540              | 128 (82.1)                    | 1239              | 64 (87.4)        | 1336              | 64 (84.4)                     |
| Cefepime                                                     | 2127              | 64 (25.6)         | 2264              | 64 (34.5)                     | 2354              | 64 (32.2)        | 2540              | 64 (41.8)                     | 1239              | 64 (34.5)        | 1336              | 64 (43.6)                     |
| Ceftazidime                                                  | 2127              | 256 (18.4)        | 2264              | 256 (21.3)                    | 2354              | 256 (31.7)       | 2540              | 256 (35.2)                    | 1239              | 256 (28.1)       | 1336              | 256 (32.0)                    |
| Ceftazidime-avibactam                                        | 2052              | 128 (88.4)        | 2178              | 128 (89)                      | 2299              | 128 (88.6)       | 2466              | 128 (89.4)                    | 1203              | 128 (89.4)       | 1298              | 8 (90.2)                      |
| Ceftriaxone                                                  | 684               | 32 (5.4)          | 742               | 32 (9.8)                      | 634               | 32 (6.0)         | 722               | 32 (13.6)                     | 472               | 32 (8.7)         | 506               | 32 (14.4)                     |
| Ciprofloxacin                                                | 1443              | 8 (17.4)          | 1522              | 8 (26.6)                      | 1720              | 8 (16.1)         | 1818              | 8 (23.2)                      | 767               | 8 (21.9)         | 830               | 8 (32.5)                      |
| Colistin <sup>d,e</sup>                                      | 1870              | 1 (NA)            | 1987              | 1 (93.0)                      | 2015              | 1 (NA)           | 2165              | 1 (96.1)                      | 1015              | 1 (NA)           | 1102              | 1 (93.9)                      |

|                                                         |      |            |      |            |      |            |      |             |      |            |      |             |
|---------------------------------------------------------|------|------------|------|------------|------|------------|------|-------------|------|------------|------|-------------|
| Gentamicin                                              | 1443 | 32 (52.1)  | 1522 | 32 (52.5)  | 1720 | 32 (49.7)  | 1818 | 32 (50.2)   | 767  | 32 (51.0)  | 830  | 32 (51.8)   |
| Imipenem <sup>f</sup>                                   | 2052 | 16 (67.2)  | 2178 | 16 (NA)    | 2299 | 16 (73.6)  | 2466 | 16 (NA)     | 1203 | 16 (69.6)  | 1298 | 16 (NA)     |
| Levofloxacin                                            | 2127 | 16 (23.5)  | 2264 | 16 (36.0)  | 2354 | 16 (21.9)  | 2540 | 16 (30.2)   | 1239 | 16 (28.3)  | 1336 | 16 (39.6)   |
| Meropenem                                               | 2127 | 32 (73.9)  | 2264 | 32 (78.8)  | 2354 | 32 (82.4)  | 2540 | 32 (86.0)   | 1239 | 32 (81.9)  | 1336 | 32 (86.2)   |
| Piperacillin/tazobactam                                 | 2127 | 256 (37.9) | 2264 | 256 (38.9) | 2354 | 128 (56.5) | 2540 | 128 (58.2)  | 1239 | 128 (54.5) | 1336 | 128 (56.4)  |
| Tigecycline <sup>g,h,i</sup>                            | 2014 | 2 (94.0)   | 2146 | 2 (92.4)   | 2085 | 2 (96.9)   | 2256 | 1 (93.5)    | 1061 | 2 (95.2)   | 1150 | 2 (95.3)    |
| <b>Europe<br/>(CLSI/EUCAST,<br/>N=14785/16435)</b>      |      |            |      |            |      |            |      |             |      |            |      |             |
| Aztreonam-avibactam <sup>c</sup>                        | 3234 | 0.5 (99.8) | 3496 | 0.5 (99.9) | 3065 | 0.5 (99.8) | 3360 | 0.25 (99.9) | 2563 | 0.5 (99.9) | 2780 | 0.5 (99.9)  |
| Aztreonam                                               | 3234 | 256 (22.6) | 3496 | 256 (27.3) | 3065 | 128 (27.3) | 3360 | 128 (32.4)  | 2563 | 128 (31.5) | 2780 | 128 (35.9)  |
| Amikacin                                                | 3473 | 32 (88.1)  | 3809 | 32 (83.4)  | 3297 | 16 (90.8)  | 3692 | 16 (86.9)   | 2731 | 16 (91.6)  | 2971 | 16 (87.7)   |
| Cefepime                                                | 3473 | 64 (32.6)  | 3809 | 64 (41.5)  | 3297 | 64 (33.1)  | 3692 | 64 (43.0)   | 2731 | 64 (39.0)  | 2971 | 64 (48.8)   |
| Ceftazidime                                             | 3473 | 256 (24.2) | 3809 | 256 (28.4) | 3297 | 256 (27.6) | 3692 | 256 (32.4)  | 2731 | 256 (32.0) | 2971 | 256 (36)    |
| Ceftazidime-avibactam                                   | 3234 | 2 (94.3)   | 3496 | 2 (94.8)   | 3065 | 1 (95.5)   | 3360 | 1 (95.9)    | 2563 | 1 (96.5)   | 2780 | 1 (96.7)    |
| Ceftriaxone                                             | 1388 | 64 (8.3)   | 1582 | 64 (15.4)  | 1333 | 64 (8.3)   | 1545 | 64 (14.8)   | 1085 | 64 (11.7)  | 1211 | 32 (20.1)   |
| Ciprofloxacin                                           | 2085 | 8 (29.8)   | 2227 | 8 (36.9)   | 1964 | 8 (23.0)   | 2147 | 8 (31.1)    | 1646 | 8 (30.7)   | 1760 | 8 (37.1)    |
| Colistin <sup>d,e</sup>                                 | 2986 | 1 (NA)     | 3224 | 1 (92.7)   | 2679 | 1 (NA)     | 2932 | 1 (95.2)    | 2207 | 1 (NA)     | 2400 | 1 (95.1)    |
| Gentamicin                                              | 2085 | 32 (57.4)  | 2227 | 32 (58.2)  | 1964 | 32 (58)    | 2147 | 32 (58.9)   | 1646 | 32 (60.5)  | 1760 | 32 (60.5)   |
| Imipenem <sup>f</sup>                                   | 3234 | 16 (73.7)  | 3496 | 8 (NA)     | 3065 | 8 (76.7)   | 3360 | 4 (NA)      | 2563 | 8 (73.2)   | 2780 | 8 (NA)      |
| Levofloxacin                                            | 3473 | 16 (34.9)  | 3809 | 16 (45.9)  | 3297 | 16 (29.2)  | 3692 | 16 (40.2)   | 2731 | 16 (34.4)  | 2971 | 16 (44.6)   |
| Meropenem                                               | 3473 | 16 (80.0)  | 3809 | 16 (88.1)  | 3297 | 8 (86.3)   | 3692 | 4 (92.3)    | 2731 | 8 (83.6)   | 2971 | 8 (91.8)    |
| Piperacillin/tazobactam                                 | 3473 | 256 (30.4) | 3809 | 256 (32.3) | 3297 | 256 (44.0) | 3692 | 128 (46.3)  | 2731 | 256 (40.8) | 2971 | 256 (42.6)  |
| Tigecycline <sup>g,h,i</sup>                            | 3282 | 2 (96.4)   | 3597 | 2 (96.5)   | 2928 | 1 (96.7)   | 3281 | 1 (97.4)    | 2400 | 1 (96.5)   | 2614 | 1 (96.6)    |
| <b>Latin America<br/>(CLSI/EUCAST,<br/>N=6640/7083)</b> |      |            |      |            |      |            |      |             |      |            |      |             |
| Aztreonam-avibactam <sup>c</sup>                        | 950  | 0.25 (100) | 986  | 0.25 (100) | 1632 | 0.25 (100) | 1758 | 0.25 (100)  | 1119 | 0.5 (99.9) | 1171 | 0.25 (99.9) |
| Aztreonam                                               | 950  | 256 (17.3) | 986  | 256 (18.7) | 1632 | 128 (29.0) | 1758 | 128 (33.2)  | 1119 | 256 (25.2) | 1171 | 256 (28.0)  |
| Amikacin                                                | 1005 | 32 (89.3)  | 1047 | 32 (83.5)  | 1706 | 16 (90.9)  | 1844 | 16 (85.5)   | 1188 | 16 (90.9)  | 1258 | 16 (84.7)   |
| Cefepime                                                | 1005 | 64 (22.7)  | 1047 | 64 (29)    | 1706 | 64 (28.7)  | 1844 | 64 (37.9)   | 1188 | 64 (27.5)  | 1258 | 64 (35.5)   |
| Ceftazidime                                             | 1005 | 128 (17.8) | 1047 | 128 (19.3) | 1706 | 128 (31.4) | 1844 | 128 (35.4)  | 1188 | 256 (25.8) | 1258 | 128 (28.4)  |
| Ceftazidime-avibactam                                   | 950  | 2 (95.5)   | 986  | 2 (95.6)   | 1632 | 1 (95.3)   | 1758 | 1 (95.7)    | 1119 | 2 (92.4)   | 1171 | 2 (92.7)    |
| Ceftriaxone                                             | 334  | 64 (4.8)   | 350  | 64 (7.4)   | 575  | 64 (6.3)   | 633  | 64 (11.9)   | 481  | 32 (7.9)   | 534  | 64 (14.4)   |
| Ciprofloxacin                                           | 671  | 8 (17.1)   | 697  | 8 (23.1)   | 1131 | 8 (17.2)   | 1211 | 8 (24.0)    | 707  | 8 (18.3)   | 724  | 8 (25.6)    |
| Colistin <sup>d,e</sup>                                 | 870  | 2 (NA)     | 903  | 1 (91.9)   | 1467 | 1 (NA)     | 1577 | 1 (95.6)    | 974  | 1 (NA)     | 1025 | 1 (94.2)    |
| Gentamicin                                              | 671  | 32 (45.3)  | 697  | 32 (45.9)  | 1131 | 32 (48.8)  | 1211 | 32 (49.1)   | 707  | 32 (44.4)  | 724  | 32 (44.2)   |
| Imipenem <sup>f</sup>                                   | 950  | 16 (73.1)  | 986  | 16 (NA)    | 1632 | 8 (78.1)   | 1758 | 8 (NA)      | 1119 | 16 (73.1)  | 1171 | 16 (NA)     |
| Levofloxacin                                            | 1005 | 16 (26.8)  | 1047 | 16 (38.2)  | 1706 | 16 (22.6)  | 1844 | 16 (32.2)   | 1188 | 16 (26.4)  | 1258 | 16 (37.4)   |
| Meropenem                                               | 1005 | 32 (77.7)  | 1047 | 32 (84.1)  | 1706 | 16 (84.2)  | 1844 | 8 (90.2)    | 1188 | 16 (82.4)  | 1258 | 16 (89.2)   |
| Piperacillin/tazobactam                                 | 1005 | 256 (39.9) | 1047 | 256 (40.1) | 1706 | 256 (49.9) | 1844 | 128 (51.7)  | 1188 | 256 (49.0) | 1258 | 128 (49.9)  |
| Tigecycline <sup>g,h,i</sup>                            | 955  | 2 (96.2)   | 999  | 2 (98.6)   | 1557 | 1 (98.1)   | 1683 | 1 (98.1)    | 1060 | 1 (97.6)   | 1129 | 1 (96.4)    |

|                                                         |     |            |     |            |     |            |     |             |     |            |     |            |
|---------------------------------------------------------|-----|------------|-----|------------|-----|------------|-----|-------------|-----|------------|-----|------------|
| <b>North America<br/>(CLSI/EUCAST,<br/>N=2472/2806)</b> |     |            |     |            |     |            |     |             |     |            |     |            |
| Aztreonam-avibactam <sup>c</sup>                        | 558 | 0.5 (99.8) | 611 | 0.5 (99.7) | 564 | 0.5 (99.8) | 631 | 0.5 (99.8)  | 350 | 1 (99.1)   | 394 | 1 (99.2)   |
| Aztreonam                                               | 558 | 128 (26.9) | 611 | 128 (32.4) | 564 | 128 (39.2) | 631 | 128 (44.1)  | 350 | 128 (41.1) | 394 | 128 (46.5) |
| Amikacin                                                | 591 | 16 (95.1)  | 647 | 16 (89.2)  | 588 | 8 (97.3)   | 667 | 8 (94.6)    | 371 | 8 (99.5)   | 416 | 8 (94.5)   |
| Cefepime                                                | 591 | 64 (49.1)  | 647 | 64 (59.5)  | 588 | 64 (53.6)  | 667 | 64 (63.6)   | 371 | 64 (53.6)  | 416 | 64 (67.8)  |
| Ceftazidime                                             | 591 | 128 (29.4) | 647 | 128 (34.5) | 588 | 128 (39.3) | 667 | 128 (43.3)  | 371 | 128 (41)   | 416 | 128 (46.4) |
| Ceftazidime-avibactam                                   | 558 | 1 (98.6)   | 611 | 1 (98.7)   | 565 | 1 (98.4)   | 632 | 1 (98.7)    | 350 | 1 (97.4)   | 394 | 1 (97.7)   |
| Ceftriaxone                                             | 112 | 64 (9.8)   | 129 | 64 (18.6)  | 89  | 64 (9.0)   | 113 | 64 (15.0)   | 74  | 32 (16.2)  | 88  | 32 (30.7)  |
| Ciprofloxacin                                           | 479 | 8 (38.0)   | 518 | 8 (45.8)   | 499 | 8 (36.9)   | 554 | 8 (44.4)    | 297 | 8 (39.4)   | 328 | 8 (47.9)   |
| Colistin <sup>d,e</sup>                                 | 501 | 1 (NA)     | 549 | 1 (95.6)   | 482 | 1 (NA)     | 551 | 1 (95.6)    | 282 | 1 (NA)     | 321 | 1 (94.1)   |
| Gentamicin                                              | 479 | 32 (67.0)  | 518 | 32 (65.8)  | 499 | 32 (68.9)  | 554 | 32 (69.5)   | 297 | 32 (71.7)  | 328 | 32 (71.3)  |
| Imipenem <sup>f</sup>                                   | 558 | 4 (81.9)   | 611 | 4 (NA)     | 565 | 4 (81.2)   | 632 | 2 (NA)      | 350 | 4 (72.6)   | 394 | 4 (NA)     |
| Levofloxacin                                            | 591 | 16 (41.5)  | 647 | 16 (51.6)  | 588 | 16 (41.7)  | 667 | 16 (50.8)   | 371 | 16 (45.0)  | 416 | 16 (54.6)  |
| Meropenem                                               | 591 | 2 (89.9)   | 647 | 1 (95.2)   | 588 | 0.5 (93.9) | 667 | 0.25 (97.5) | 371 | 0.5 (90.8) | 416 | 0.5 (97.1) |
| Piperacillin/tazobactam                                 | 591 | 128 (41.6) | 647 | 128 (44.4) | 588 | 128 (57.1) | 667 | 128 (58.9)  | 371 | 128 (56.1) | 416 | 128 (57.5) |
| Tigecycline <sup>g,h,i</sup>                            | 559 | 1 (95.9)   | 612 | 1 (98.1)   | 508 | 1 (96.1)   | 589 | 1 (95.2)    | 305 | 2 (94.1)   | 346 | 1 (96.1)   |

<sup>a</sup> Not all drugs in the panel were tested every year. <sup>b</sup> Data includes percentage isolates susceptible at increased exposure. <sup>c</sup> No breakpoints available from CLSI and EUCAST. Values expressed are indicative of the cumulative percentage of isolates inhibited at  $\leq 8$  mg/L for comparison purposes. <sup>d</sup> Susceptible category for colistin not available for CLSI breakpoints (only intermediate and resistant isolates are available). <sup>e</sup> Data for colistin do not include isolates of *Morganella morganii*, *Proteus hauseri*, *Proteus mirabilis*, *Proteus vulgaris*, *Providencia alcalifaciens*, *Providencia rettgeri*, *Providencia* spp, *Providencia stuartii*, and *Serratia marcescens* because of their intrinsic resistance. <sup>f</sup> Data for imipenem not available per EUCAST. <sup>g</sup> Data for tigecycline do not include isolates of *Morganella morganii*, *Proteus hauseri*, *Proteus mirabilis*, *Proteus vulgaris*, *Providencia alcalifaciens*, *Providencia rettgeri*, *Providencia* spp, and *Providencia stuartii* due to their intrinsic resistance. <sup>h</sup> Data for tigecycline was calculated based on FDA approved breakpoints for CLSI. <sup>i</sup> EUCAST data for susceptibility to tigecycline are limited to *E. coli* and *C. Koseri*; denominator (n): AfME: RTI= 136, UTI= 498, SSTI= 357; APAC: RTI= 528, UTI= 1361, SSTI= 548; Europe: RTI= 855, UTI= 1171, SSTI= 935; LATAM: RTI= 208, UTI= 790, SSTI= 504; North America: RTI= 213, UTI= 293, SSTI= 154. MIC, minimum inhibitory concentration; N, total number of isolates; n, number of isolates from infection sources; NA, not available; RTI, respiratory tract infection; SSTI, skin and soft tissue infection; UTI, urinary tract infection.

Table S4. Cont.

|                                                              | BSI            |                                       |                |                                                    | IAI            |                                       |                |                                                    |
|--------------------------------------------------------------|----------------|---------------------------------------|----------------|----------------------------------------------------|----------------|---------------------------------------|----------------|----------------------------------------------------|
|                                                              | CLSI           |                                       | EUCAST         |                                                    | CLSI           |                                       | EUCAST         |                                                    |
|                                                              | n <sup>a</sup> | MIC <sub>90</sub><br>(μg/mL)<br>(% S) | n <sup>a</sup> | MIC <sub>90</sub><br>(mg/L)<br>(% S <sup>b</sup> ) | n <sup>a</sup> | MIC <sub>90</sub><br>(μg/mL)<br>(% S) | n <sup>a</sup> | MIC <sub>90</sub><br>(mg/L)<br>(% S <sup>b</sup> ) |
| <b>Africa-Middle East<br/>(CLSI/EUCAST,<br/>N=3627/3935)</b> |                |                                       |                |                                                    |                |                                       |                |                                                    |
| Aztreonam-avibactam <sup>c</sup>                             | 750            | 0.25 (99.7)                           | 802            | 0.25 (99.8)                                        | 399            | 0.25 (99.8)                           | 436            | 0.25 (99.8)                                        |
| Aztreonam                                                    | 750            | 128 (20.7)                            | 802            | 128 (25.4)                                         | 399            | 128 (30.6)                            | 436            | 128 (35.1)                                         |
| Amikacin                                                     | 762            | 16 (92.8)                             | 820            | 16 (88.4)                                          | 413            | 8 (95.4)                              | 454            | 8 (91.2)                                           |
| Cefepime                                                     | 762            | 64 (23.4)                             | 820            | 64 (32.3)                                          | 413            | 64 (34.6)                             | 454            | 64 (44.5)                                          |

|                                                        |      |            |      |             |      |            |      |            |
|--------------------------------------------------------|------|------------|------|-------------|------|------------|------|------------|
| Ceftazidime                                            | 762  | 128 (19.3) | 820  | 128 (23.7)  | 413  | 128 (31.2) | 454  | 128 (35.2) |
| Ceftazidime-avibactam                                  | 750  | 1 (92.0)   | 802  | 1 (92.5)    | 399  | 1 (96.0)   | 436  | 1 (96.3)   |
| Ceftriaxone                                            | 113  | 32 (8.0)   | 124  | 64 (13.7)   | 101  | 32 (12.9)  | 112  | 64 (18.8)  |
| Ciprofloxacin                                          | 649  | 8 (22.0)   | 696  | 8 (33.5)    | 312  | 8 (23.7)   | 342  | 8 (37.7)   |
| Colistin <sup>d,e</sup>                                | 709  | 1 (NA)     | 751  | 1 (97.1)    | 365  | 1 (NA)     | 400  | 1 (97.5)   |
| Gentamicin                                             | 649  | 32 (49.3)  | 696  | 32 (50.7)   | 312  | 32 (56.4)  | 342  | 32 (56.4)  |
| Imipenem <sup>f</sup>                                  | 750  | 8 (79.7)   | 802  | 8 (NA)      | 399  | 4 (79.7)   | 436  | 4 (NA)     |
| Levofloxacin                                           | 762  | 16 (37.1)  | 820  | 16 (51.5)   | 413  | 16 (32.9)  | 454  | 16 (49.3)  |
| Meropenem                                              | 762  | 8 (86.8)   | 820  | 8 (91.1)    | 413  | 2 (88.6)   | 454  | 2 (93.4)   |
| Piperacillin/tazobactam                                | 762  | 128 (50.9) | 820  | 128 (52.7)  | 413  | 128 (53.8) | 454  | 128 (55.1) |
| Tigecycline <sup>g,h,i</sup>                           | 729  | 1 (97.8)   | 780  | 1 (97.3)    | 383  | 1 (96.1)   | 423  | 1 (96.7)   |
| <b>Asia-Pacific<br/>(CLSI/EUCAST,<br/>N=8781/9441)</b> |      |            |      |             |      |            |      |            |
| Aztreonam-avibactam <sup>c</sup>                       | 1338 | 0.5 (99.5) | 1421 | 0.5 (99.5)  | 967  | 0.5 (99.6) | 1037 | 0.5 (99.6) |
| Aztreonam                                              | 1698 | 256 (22.1) | 1811 | 256 (26.4)  | 1230 | 128 (25.8) | 1322 | 128 (29.9) |
| Amikacin                                               | 1766 | 128 (83.4) | 1908 | 128 (81.0)  | 1277 | 16 (90.5)  | 1375 | 16 (87.4)  |
| Cefepime                                               | 1766 | 64 (24.9)  | 1908 | 64 (33.9)   | 1277 | 64 (36.4)  | 1375 | 64 (45.5)  |
| Ceftazidime                                            | 1766 | 256 (26.9) | 1908 | 256 (30.4)  | 1277 | 256 (29.4) | 1375 | 256 (33.5) |
| Ceftazidime-avibactam                                  | 1698 | 128 (87.2) | 1811 | 128 (88.0)  | 1230 | 2 (92.6)   | 1322 | 2 (93.1)   |
| Ceftriaxone                                            | 289  | 64 (5.2)   | 343  | 64 (11.4)   | 442  | 32 (6.3)   | 475  | 32 (12.4)  |
| Ciprofloxacin                                          | 1477 | 8 (16.6)   | 1565 | 8 (24.7)    | 835  | 8 (25.3)   | 900  | 8 (34.1)   |
| Colistin <sup>d,e</sup>                                | 1574 | 1 (NA)     | 1679 | 1 (94.5)    | 1142 | 1 (NA)     | 1239 | 1 (93.6)   |
| Gentamicin                                             | 1477 | 32 (50.6)  | 1565 | 32 (51.4)   | 835  | 32 (59.5)  | 900  | 32 (60.6)  |
| Imipenem <sup>f</sup>                                  | 1698 | 16 (73.0)  | 1811 | 16 (NA)     | 1230 | 16 (78.9)  | 1322 | 8 (NA)     |
| Levofloxacin                                           | 1766 | 16 (22.4)  | 1908 | 16 (32.2)   | 1277 | 16 (31.6)  | 1375 | 16 (41.2)  |
| Meropenem                                              | 1766 | 32 (78.8)  | 1908 | 32 (81.9)   | 1277 | 16 (85.8)  | 1375 | 16 (88.9)  |
| Piperacillin/tazobactam                                | 1766 | 128 (54.0) | 1908 | 128 (56.0)  | 1277 | 128 (56.0) | 1375 | 128 (57.8) |
| Tigecycline <sup>g,h,i</sup>                           | 1668 | 2 (96.8)   | 1805 | 2 (94.4)    | 1199 | 1 (96.9)   | 1302 | 1 (94.1)   |
| <b>Europe<br/>(CLSI/EUCAST,<br/>N=14785/16435)</b>     |      |            |      |             |      |            |      |            |
| Aztreonam-avibactam <sup>c</sup>                       | 2842 | 0.5 (99.9) | 3137 | 0.25 (99.9) | 1864 | 0.5 (100)  | 2081 | 0.5 (100)  |
| Aztreonam                                              | 2842 | 128 (30.0) | 3137 | 128 (35.9)  | 1864 | 128 (27.1) | 2081 | 128 (32.9) |
| Amikacin                                               | 3140 | 16 (90.9)  | 3540 | 16 (86.0)   | 2056 | 16 (91.9)  | 2308 | 16 (87.4)  |
| Cefepime                                               | 3140 | 64 (34.8)  | 3540 | 64 (44.2)   | 2056 | 64 (39.4)  | 2308 | 64 (50.3)  |
| Ceftazidime                                            | 3140 | 256 (30.2) | 3540 | 128 (35.5)  | 2056 | 256 (30.4) | 2308 | 256 (36)   |
| Ceftazidime-avibactam                                  | 2842 | 2 (95.9)   | 3137 | 2 (96.2)    | 1864 | 2 (95.7)   | 2081 | 2 (96.2)   |
| Ceftriaxone                                            | 689  | 64 (11.9)  | 836  | 64 (16.9)   | 783  | 64 (13.5)  | 904  | 64 (21.5)  |
| Ciprofloxacin                                          | 2451 | 8 (26.9)   | 2704 | 8 (35.8)    | 1273 | 8 (33.6)   | 1404 | 8 (41.7)   |
| Colistin <sup>d,e</sup>                                | 2624 | 1 (NA)     | 2902 | 1 (94.9)    | 1751 | 1 (NA)     | 1968 | 1 (95.6)   |
| Gentamicin                                             | 2451 | 32 (56.5)  | 2704 | 32 (58.5)   | 1273 | 32 (67.1)  | 1404 | 32 (67.9)  |
| Imipenem <sup>f</sup>                                  | 2842 | 8 (76.2)   | 3137 | 8 (NA)      | 1864 | 8 (78.3)   | 2081 | 8 (NA)     |
| Levofloxacin                                           | 3140 | 16 (30.7)  | 3540 | 16 (41.2)   | 2056 | 16 (38.8)  | 2308 | 16 (47.8)  |
| Meropenem                                              | 3140 | 16 (81.1)  | 3540 | 16 (88.3)   | 2056 | 16 (83)    | 2308 | 16 (90)    |
| Piperacillin/tazobactam                                | 3140 | 128 (39.6) | 3540 | 128 (42.7)  | 2056 | 256 (37.5) | 2308 | 256 (40.7) |
| Tigecycline <sup>g,h,i</sup>                           | 2956 | 2 (96.2)   | 3342 | 2 (97.0)    | 1952 | 1 (96.1)   | 2202 | 1 (96.2)   |



**Latin America  
(CLSI/EUCAST,  
N=6640/7083)**

|                                  |      |             |      |             |      |            |      |            |
|----------------------------------|------|-------------|------|-------------|------|------------|------|------------|
| Aztreonam-avibactam <sup>c</sup> | 1478 | 0.25 (99.9) | 1562 | 0.25 (99.9) | 1074 | 0.25 (100) | 1128 | 0.25 (100) |
| Aztreonam                        | 1478 | 256 (19.8)  | 1562 | 256 (23.3)  | 1074 | 256 (22.3) | 1128 | 256 (25.5) |
| Amikacin                         | 1548 | 32 (87.7)   | 1656 | 32 (81.6)   | 1170 | 16 (92.8)  | 1251 | 16 (86.9)  |
| Cefepime                         | 1548 | 64 (23.1)   | 1656 | 64 (31.4)   | 1170 | 64 (26.8)  | 1251 | 64 (34.5)  |
| Ceftazidime                      | 1548 | 128 (22.2)  | 1656 | 128 (25.5)  | 1170 | 128 (27.0) | 1251 | 128 (29.7) |
| Ceftazidime-avibactam            | 1478 | 2 (93.9)    | 1562 | 2 (94.2)    | 1074 | 2 (96.1)   | 1128 | 2 (96.3)   |
| Ceftriaxone                      | 394  | 64 (5.1)    | 434  | 64 (7.4)    | 505  | 64 (7.3)   | 554  | 64 (10.3)  |
| Ciprofloxacin                    | 1154 | 8 (19.0)    | 1222 | 8 (27.7)    | 665  | 8 (23.0)   | 697  | 8 (30.6)   |
| Colistin <sup>d,e</sup>          | 1359 | 1 (NA)      | 1443 | 1 (93.0)    | 1020 | 1 (NA)     | 1073 | 1 (96.2)   |
| Gentamicin                       | 1154 | 32 (51.0)   | 1222 | 32 (51.8)   | 665  | 32 (55.9)  | 697  | 32 (56.0)  |
| Imipenem <sup>f</sup>            | 1478 | 16 (72.7)   | 1562 | 16 (NA)     | 1074 | 8 (81.1)   | 1128 | 8 (NA)     |
| Levofloxacin                     | 1548 | 16 (30.0)   | 1656 | 16 (42.8)   | 1170 | 16 (26.8)  | 1251 | 16 (35.9)  |
| Meropenem                        | 1548 | 16 (76.6)   | 1656 | 16 (85.0)   | 1170 | 16 (83.8)  | 1251 | 8 (90.3)   |
| Piperacillin/tazobactam          | 1548 | 128 (44.2)  | 1656 | 128 (45.8)  | 1170 | 256 (47.3) | 1251 | 256 (48.4) |
| Tigecycline <sup>g,h,i</sup>     | 1477 | 1 (97.6)    | 1585 | 1 (97.5)    | 1121 | 1 (97.4)   | 1201 | 1 (96.5)   |

**North America  
(CLSI/EUCAST,  
N=2472/2806)**

|                                  |     |             |     |             |     |            |     |            |
|----------------------------------|-----|-------------|-----|-------------|-----|------------|-----|------------|
| Aztreonam-avibactam <sup>c</sup> | 596 | 0.5 (99.8)  | 678 | 0.25 (99.9) | 270 | 0.5 (100)  | 312 | 0.5 (100)  |
| Aztreonam                        | 596 | 128 (38.9)  | 678 | 128 (45.9)  | 270 | 128 (37.8) | 312 | 128 (44.9) |
| Amikacin                         | 620 | 8 (97.3)    | 727 | 8 (94.1)    | 296 | 8 (97.3)   | 340 | 8 (95.6)   |
| Cefepime                         | 620 | 64 (50.8)   | 727 | 64 (59.7)   | 296 | 64 (56.4)  | 340 | 32 (68.2)  |
| Ceftazidime                      | 620 | 128 (39.4)  | 727 | 128 (44.7)  | 296 | 128 (38.2) | 340 | 128 (45.6) |
| Ceftazidime-avibactam            | 596 | 1 (99.8)    | 678 | 1 (99.9)    | 270 | 1 (98.9)   | 312 | 1 (99.0)   |
| Ceftriaxone                      | 44  | 64 (13.6)   | 75  | 64 (20.0)   | 76  | 64 (13.2)  | 86  | 64 (17.4)  |
| Ciprofloxacin                    | 576 | 8 (29.2)    | 652 | 8 (39.4)    | 220 | 8 (46.4)   | 254 | 8 (55.1)   |
| Colistin <sup>d,e</sup>          | 555 | 1 (NA)      | 628 | 1 (97.0)    | 258 | 0.5 (NA)   | 296 | 0.5 (96.6) |
| Gentamicin                       | 576 | 32 (68.4)   | 652 | 32 (69.8)   | 220 | 32 (76.4)  | 254 | 32 (76.8)  |
| Imipenem <sup>f</sup>            | 596 | 2 (89.1)    | 678 | 2 (NA)      | 270 | 2 (85.6)   | 312 | 2 (NA)     |
| Levofloxacin                     | 620 | 16 (36.1)   | 727 | 16 (45.8)   | 296 | 16 (46.3)  | 340 | 16 (52.1)  |
| Meropenem                        | 620 | 0.25 (96.1) | 727 | 0.12 (98.4) | 296 | 2 (88.5)   | 340 | 0.5 (95.6) |
| Piperacillin/tazobactam          | 620 | 128 (60.0)  | 727 | 128 (62.3)  | 296 | 128 (45.6) | 340 | 128 (50.3) |
| Tigecycline <sup>g,h,i</sup>     | 584 | 1 (98.3)    | 684 | 1 (98.5)    | 285 | 1 (97.5)   | 325 | 1 (96.7)   |

<sup>a</sup> Not all drugs in the panel were tested every year. <sup>b</sup> Data includes percentage isolates susceptible at increased exposure. <sup>c</sup> No breakpoints available from CLSI and EUCAST. Values expressed are indicative of the cumulative percentage of isolates inhibited at  $\leq 8$  mg/L for comparison purposes. <sup>d</sup> Susceptible category for colistin not available for CLSI breakpoints (only intermediate and resistant isolates are available). <sup>e</sup> Data for colistin do not include isolates of *Morganella morganii*, *Proteus hauseri*, *Proteus mirabilis*, *Proteus vulgaris*, *Providencia alcalifaciens*, *Providencia rettgeri*, *Providencia* spp, *Providencia stuartii*, and *Serratia marcescens* because of their intrinsic resistance. <sup>f</sup> Data for imipenem not available per EUCAST. <sup>g</sup> Data for tigecycline do not include isolates of *Morganella morganii*, *Proteus hauseri*, *Proteus mirabilis*, *Proteus vulgaris*, *Providencia alcalifaciens*, *Providencia rettgeri*, *Providencia* spp, and *Providencia stuartii* due to their intrinsic resistance. <sup>h</sup> Data for tigecycline was calculated based on FDA approved breakpoints for CLSI. <sup>i</sup> EUCAST data for susceptibility to tigecycline are limited to *E. coli* and *C. Koseri*; denominator (n): AfME: BSI= 293, IAI= 211; APAC: BSI= 1027, IAI=731; Europe: BSI= 1377, IAI= 986; LATAM: BSI= 570, IAI=624; North America: BSI= 398, IAI=179. BSI,

bloodstream infections; IAI, intra-abdominal infection; MIC, minimum inhibitory concentration; N, total number of isolates; n, number of isolates from infection sources; NA, not available.

**Table S5.** *In vitro* activity of ATM-AVI and comparator agents tested against ESBL-producing Enterobacterales isolates across regions stratified by wards from 2016–2020.

| ICU                              |                |                                                                   | Non-ICU        |                                                                   |
|----------------------------------|----------------|-------------------------------------------------------------------|----------------|-------------------------------------------------------------------|
| Africa-Middle East<br>(N=2176)   | n <sup>b</sup> | MIC <sub>90</sub> (μg/mL)<br>(% S, CLSI/%S, EUCAST <sup>a</sup> ) | n <sup>b</sup> | MIC <sub>90</sub> (μg/mL)<br>(% S, CLSI/%S, EUCAST <sup>a</sup> ) |
| Aztreonam-avibactam <sup>c</sup> | 476            | 0.25 (100)                                                        | 1273           | 0.25 (99.9)                                                       |
| Aztreonam                        | 476            | 128 (6.9/6.9)                                                     | 1273           | 128 (8.2/8.2)                                                     |
| Amikacin                         | 503            | 32 (89.9/83.7)                                                    | 1369           | 16 (94.0/88.9)                                                    |
| Cefepime                         | 503            | 64 (7.0/11.5)                                                     | 1369           | 64 (7.2/13.7)                                                     |
| Ceftazidime                      | 503            | 128 (9.9/9.9)                                                     | 1369           | 128 (13.1/13.1)                                                   |
| Ceftazidime-avibactam            | 476            | 2 (90.6/90.6)                                                     | 1273           | 1 (92.9/92.9)                                                     |
| Ceftriaxone                      | 168            | 64 (1.2/2.4)                                                      | 565            | 64 (3.0/3.2)                                                      |
| Ciprofloxacin                    | 335            | 8 (16.4/26.9)                                                     | 804            | 8 (12.1/21.1)                                                     |
| Colistin <sup>d,e</sup>          | 463            | 1 (NA/98.1)                                                       | 1236           | 1 (NA/98.7)                                                       |
| Gentamicin                       | 335            | 32 (39.1/38.8)                                                    | 804            | 32 (46.1/44.7)                                                    |
| Imipenem <sup>f</sup>            | 476            | 16 (74.8/NA)                                                      | 1273           | 4 (84.1/NA)                                                       |
| Levofloxacin                     | 503            | 16 (36.2/50.3)                                                    | 1369           | 16 (28.6/41.1)                                                    |
| Meropenem                        | 503            | 16 (79.5/85.5)                                                    | 1369           | 2 (89.0/93.4)                                                     |
| Piperacillin/tazobactam          | 503            | 128 (46.7/46.7)                                                   | 1369           | 128 (54.1/54.1)                                                   |
| Tigecycline <sup>g,h,i</sup>     | 493            | 1 (96.6/98.5)                                                     | 1332           | 1 (97.4/97.2)                                                     |
| <b>Asia-Pacific<br/>(N=4106)</b> |                |                                                                   |                |                                                                   |
| Aztreonam-avibactam <sup>c</sup> | 845            | 1 (98.6)                                                          | 2020           | 0.5 (99.9)                                                        |
| Aztreonam                        | 998            | 256 (5.1/5.1)                                                     | 2306           | 256 (10.9/10.9)                                                   |
| Amikacin                         | 1025           | 128 (64.7/61.0)                                                   | 2472           | 64 (87.7/83.3)                                                    |
| Cefepime                         | 1025           | 64 (8.3/11.4)                                                     | 2472           | 64 (13.0/19.9)                                                    |
| Ceftazidime                      | 1025           | 256 (8.6/8.6)                                                     | 2472           | 256 (18.9/18.9)                                                   |
| Ceftazidime-avibactam            | 998            | 256 (71.6/71.6)                                                   | 2306           | 128 (88.0/88.0)                                                   |
| Ceftriaxone                      | 304            | 32 (4.0/5.6)                                                      | 1317           | 64 (4.2/5.9)                                                      |
| Ciprofloxacin                    | 721            | 8 (6.4/9.9)                                                       | 1155           | 8 (9.8/13.8)                                                      |
| Colistin <sup>d,e</sup>          | 958            | 1 (NA/94.2)                                                       | 2234           | 1 (NA/96.1)                                                       |
| Gentamicin                       | 721            | 32 (36.5/35.5)                                                    | 1155           | 32 (49.4/48.1)                                                    |
| Imipenem <sup>f</sup>            | 998            | 16 (52.6/NA)                                                      | 2306           | 16 (77.8/NA)                                                      |
| Levofloxacin                     | 1025           | 16 (14.8/21.9)                                                    | 2472           | 16 (19.7/27.4)                                                    |
| Meropenem                        | 1025           | 32 (55.9/60.3)                                                    | 2472           | 32 (81.5/84.2)                                                    |
| Piperacillin/tazobactam          | 1025           | 128 (32.6/32.6)                                                   | 2472           | 128 (54.7/54.7)                                                   |
| Tigecycline <sup>g,h,i</sup>     | 992            | 2 (95.6/96.3)                                                     | 2407           | 2 (97.0/95.9)                                                     |
| <b>Europe<br/>(N=8807)</b>       |                |                                                                   |                |                                                                   |
| Aztreonam-avibactam <sup>c</sup> | 2082           | 0.25 (99.9)                                                       | 4226           | 0.25 (99.9)                                                       |
| Aztreonam                        | 2082           | 256 (7.3/7.3)                                                     | 4226           | 256 (10.0/10.0)                                                   |
| Amikacin                         | 2453           | 64 (86.3/80.3)                                                    | 5014           | 16 (91.0/85.7)                                                    |
| Cefepime                         | 2453           | 64 (9.6/13.8)                                                     | 5014           | 64 (13.1/18.7)                                                    |
| Ceftazidime                      | 2453           | 256 (12.8/12.8)                                                   | 5014           | 256 (17.2/17.2)                                                   |
| Ceftazidime-avibactam            | 2082           | 4 (91.9/91.9)                                                     | 4226           | 2 (94.8/94.8)                                                     |
| Ceftriaxone                      | 1256           | 64 (3.3/4.6)                                                      | 2879           | 64 (4.3/6.0)                                                      |
| Ciprofloxacin                    | 1197           | 8 (9.8/15.1)                                                      | 2135           | 8 (12.0/17.1)                                                     |
| Colistin <sup>d,e</sup>          | 2020           | 2 (NA/91.5)                                                       | 4055           | 1 (NA/95.2)                                                       |

|                                   |      |                 |      |                 |
|-----------------------------------|------|-----------------|------|-----------------|
| Gentamicin                        | 1197 | 32 (41.9/41.3)  | 2135 | 32 (50.1/49.5)  |
| Imipenem <sup>f</sup>             | 2082 | 16 (70.0/NA)    | 4226 | 8 (78.4/NA)     |
| Levofloxacin                      | 2453 | 16 (21.9/32.4)  | 5014 | 16 (24.3/31.9)  |
| Meropenem                         | 2453 | 16 (74.9/83.3)  | 5014 | 8 (83.5/90.0)   |
| Piperacillin/tazobactam           | 2453 | 256 (36.0/36.0) | 5014 | 256 (47.5/47.5) |
| Tigecycline <sup>g,hi</sup>       | 2397 | 2 (96.5/98.2)   | 4855 | 1 (96.7/98.4)   |
| <b>Latin America<br/>(N=4115)</b> |      |                 |      |                 |
| Aztreonam-avibactam <sup>c</sup>  | 995  | 0.25 (100)      | 2076 | 0.25 (100)      |
| Aztreonam                         | 995  | 256 (6.2/6.2)   | 2076 | 256 (7.4/7.4)   |
| Amikacin                          | 1077 | 32 (84.9/77.8)  | 2346 | 16 (92.2/86.5)  |
| Cefepime                          | 1077 | 64 (7.8/13.1)   | 2346 | 64 (7.8/13.0)   |
| Ceftazidime                       | 1077 | 256 (11.7/11.7) | 2346 | 256 (15.4/15.4) |
| Ceftazidime-avibactam             | 995  | 4 (91.1/91.1)   | 2076 | 2 (94.7/94.7)   |
| Ceftriaxone                       | 481  | 64 (4.0/4.2)    | 1267 | 64 (1.7/3.0)    |
| Ciprofloxacin                     | 596  | 8 (8.6/13.8)    | 1079 | 8 (8.3/13.0)    |
| Colistin <sup>d,e</sup>           | 970  | 1 (NA/93.0)     | 2016 | 1 (NA/96.1)     |
| Gentamicin                        | 596  | 32 (34.6/33.2)  | 1079 | 32 (38.7/38.2)  |
| Imipenem <sup>f</sup>             | 995  | 16 (71.7/NA)    | 2076 | 8 (83.0/NA)     |
| Levofloxacin                      | 1077 | 16 (21.7/34.1)  | 2346 | 16 (18.8/28.3)  |
| Meropenem                         | 1077 | 16 (73.4/81.1)  | 2346 | 8 (84.9/90.8)   |
| Piperacillin/tazobactam           | 1077 | 256 (40.9/40.9) | 2346 | 256 (51.2/51.2) |
| Tigecycline <sup>g,hi</sup>       | 1058 | 1 (97.3/99.0)   | 2298 | 1 (97.6/97.7)   |
| <b>North America<br/>(N=1099)</b> |      |                 |      |                 |
| Aztreonam-avibactam <sup>c</sup>  | 218  | 0.25 (100)      | 535  | 0.25 (99.8)     |
| Aztreonam                         | 218  | 128 (9.2/9.2)   | 535  | 128 (13.3/13.3) |
| Amikacin                          | 254  | 16 (95.3/89.4)  | 636  | 8 (95.8/90.7)   |
| Cefepime                          | 254  | 64 (20.5/29.5)  | 636  | 64 (19.0/26.9)  |
| Ceftazidime                       | 254  | 128 (16.5/16.5) | 636  | 128 (19.5/19.5) |
| Ceftazidime-avibactam             | 218  | 1 (98.6/98.6)   | 535  | 1 (97.6/97.6)   |
| Ceftriaxone                       | 113  | 64 (7.1/9.7)    | 280  | 64 (8.6/10.4)   |
| Ciprofloxacin                     | 141  | 8 (14.9/24.1)   | 356  | 8 (10.7/15.7)   |
| Colistin <sup>d,e</sup>           | 211  | 0.5 (NA/96.2)   | 513  | 0.5 (NA/98.1)   |
| Gentamicin                        | 141  | 32 (62.4/59.6)  | 356  | 32 (57.0/56.7)  |
| Imipenem <sup>f</sup>             | 218  | 2 (87.2/NA)     | 535  | 2 (87.7/NA)     |
| Levofloxacin                      | 254  | 16 (28.4/37.8)  | 636  | 16 (25.2/32.9)  |
| Meropenem                         | 254  | 0.5 (91.3/95.7) | 636  | 0.5 (91.8/95.9) |
| Piperacillin/tazobactam           | 254  | 128 (53.5/53.5) | 636  | 128 (59.4/59.4) |
| Tigecycline <sup>g,hi</sup>       | 247  | 1 (96.4/97.4)   | 615  | 1 (98.4/96.4)   |

<sup>a</sup> Data includes percentage isolates susceptible at increased exposure. <sup>b</sup> Not all drugs in the panel were tested every year. <sup>c</sup> No breakpoints available from CLSI and EUCAST. Values expressed are indicative of the cumulative percentage of isolates inhibited at  $\leq 8$  mg/L for comparison purposes. <sup>d</sup> Susceptible category for colistin not available for CLSI breakpoints (only intermediate and resistant isolates are available). <sup>e</sup> Data for colistin do not include isolates of *Morganella morganii*, *Proteus hauseri*, *Proteus mirabilis*, *Proteus vulgaris*, *Providencia alcalifaciens*, *Providencia rettgeri*, *Providencia* spp, *Providencia stuartii*, and *Serratia marcescens* because of their intrinsic resistance. <sup>f</sup> Data for imipenem not available per EUCAST. <sup>g</sup> Data for tigecycline do not include isolates of *Morganella morganii*, *Proteus hauseri*, *Proteus mirabilis*, *Proteus vulgaris*, *Providencia alcalifaciens*, *Providencia rettgeri*, *Providencia* spp, and *Providencia stuartii* due to their intrinsic resistance. <sup>h</sup> Data for tigecycline was calculated based on FDA approved breakpoints for CLSI. <sup>i</sup> EUCAST data for susceptibility to tigecycline are limited to *E. coli* and *C. koseri*; denominator (n): AfME: ICU=129, non-ICU=536; APAC: ICU=327, non-ICU=1261; Europe: ICU=608, non-ICU=1724; LATAM: ICU=286, non-ICU=1071; North America:

ICU=113, non-ICU=331. ICU, intensive care unit; MIC, minimum inhibitory concentration; N, total number of isolates; n, number of isolates from wards; NA, not available.

**Table S6.** *In vitro* activity of ATM-AVI and comparator agents tested against ESBL-producing Enterobacterales isolates across regions stratified by infection sources from 2016-2020.

|                                  |      | MIC <sub>90</sub> (µg/mL) (% S, CLSI/%S, EUCAST <sup>a</sup> ) |      |                 |     |                 |     |                 |     |                 |  |
|----------------------------------|------|----------------------------------------------------------------|------|-----------------|-----|-----------------|-----|-----------------|-----|-----------------|--|
|                                  |      | RTI                                                            |      | UTI             |     | SSTI            |     | BSI             |     | IAI             |  |
| Africa-Middle East (N=2176)      |      | n <sup>b</sup>                                                 |      | n <sup>b</sup>  |     | n <sup>b</sup>  |     | n <sup>b</sup>  |     | n <sup>b</sup>  |  |
| Aztreonam-avibactam <sup>c</sup> | 373  | 0.25 (100)                                                     | 523  | 0.25 (100)      | 469 | 0.25 (100)      | 438 | 0.25 (100)      | 215 | 0.25 (99.5)     |  |
| Aztreonam                        | 373  | 128 (8.9/8.9)                                                  | 523  | 128 (4.8/4.8)   | 469 | 128 (9.8/9.8)   | 438 | 128 (4.6/4.6)   | 215 | 128 (9.3/9.3)   |  |
| Amikacin                         | 390  | 16 (91.5/87.4)                                                 | 565  | 16 (94.7/88.9)  | 510 | 16 (93.9/88.4)  | 467 | 16 (91.7/86.9)  | 237 | 16 (93.7/89)    |  |
| Cefepime                         | 390  | 64 (5.9/12.1)                                                  | 565  | 64 (5/11.7)     | 510 | 64 (10.0/16.9)  | 467 | 64 (5.6/10.3)   | 237 | 64 (10.6/16.5)  |  |
| Ceftazidime                      | 390  | 128 (14.9/14.9)                                                | 565  | 256 (9.6/9.6)   | 510 | 128 (15.5/15.5) | 467 | 256 (8.6/8.6)   | 237 | 128 (13.1/13.1) |  |
| Ceftazidime-avibactam            | 373  | 1 (94.1/94.1)                                                  | 523  | 2 (91.4/91.4)   | 469 | 1 (93.4/93.4)   | 438 | 128 (88.8/88.8) | 215 | 1 (94/94)       |  |
| Ceftriaxone                      | 177  | 32 (4.0/4.0)                                                   | 204  | 64 (2.0/2.0)    | 249 | 64 (3.6/4.4)    | 118 | 64 (0.9/1.7)    | 91  | 64 (1.1/2.2)    |  |
| Ciprofloxacin                    | 213  | 8 (13.2/21.6)                                                  | 361  | 8 (12.2/20.2)   | 261 | 8 (11.9/25.7)   | 349 | 8 (16.3/23.8)   | 146 | 8 (13.0/25.3)   |  |
| Colistin <sup>d,e</sup>          | 356  | 1 (NA/98.9)                                                    | 510  | 1 (NA/98.6)     | 457 | 1 (NA/97.6)     | 430 | 1 (NA/98.8)     | 209 | 1 (0/99.5)      |  |
| Gentamicin                       | 213  | 32 (44.6/42.7)                                                 | 361  | 32 (42.1/41.6)  | 261 | 32 (47.5/46.4)  | 349 | 32 (43.6/42.1)  | 146 | 32 (50/48.6)    |  |
| Imipenem <sup>f</sup>            | 373  | 4 (79.9/NA)                                                    | 523  | 4 (84.9/90.8)   | 469 | 4 (84.9/NA)     | 438 | 8 (79.9/85.4)   | 215 | 8 (79.1/NA)     |  |
| Levofloxacin                     | 390  | 16 (31.5/49.2)                                                 | 565  | 16 (28.9/35.6)  | 510 | 16 (28.2/42.6)  | 467 | 16 (36.2/49.9)  | 237 | 16 (28.3/44.3)  |  |
| Meropenem                        | 390  | 16 (84.9/89.2)                                                 | 565  | 2 (88.9/93.5)   | 510 | 2 (89.8/93.7)   | 467 | 16 (83.3/86.9)  | 237 | 8 (84.8/90.3)   |  |
| Piperacillin/tazobactam          | 390  | 128 (50.0/50.0)                                                | 565  | 128 (52.4/52.4) | 510 | 128 (57.5/57.5) | 467 | 128 (49.3/49.3) | 237 | 128 (54.9/54.9) |  |
| Tigecycline <sup>g,hi</sup>      | 374  | 2 (95.5/96.5)                                                  | 553  | 1 (98.2/98.0)   | 499 | 1 (97.4/96.8)   | 461 | 1 (98.1/98.7)   | 231 | 1 (95.7/98.0)   |  |
| Asia-Pacific (N=4106)            |      |                                                                |      |                 |     |                 |     |                 |     |                 |  |
| Aztreonam-avibactam <sup>c</sup> | 872  | 0.5 (99.7)                                                     | 875  | 0.5 (99.1)      | 528 | 0.5 (99.4)      | 601 | 0.25 (99.7)     | 424 | 0.5 (100)       |  |
| Aztreonam                        | 964  | 256 (7.3/7.3)                                                  | 1052 | 256 (12.0/12.0) | 596 | 256 (11.6/11.6) | 728 | 256 (6.3/6.3)   | 485 | 256 (13.4/13.4) |  |
| Amikacin                         | 1023 | 128 (77.8/74.2)                                                | 1105 | 128 (81.4/76.6) | 619 | 128 (84.2/79.3) | 819 | 128 (79.4/75.6) | 526 | 64 (88.4/84.2)  |  |
| Cefepime                         | 1023 | 64 (11.1/16.5)                                                 | 1105 | 64 (12.2/20.1)  | 619 | 64 (12.4/18.3)  | 819 | 64 (8.4/14.0)   | 526 | 64 (15.4/21.1)  |  |
| Ceftazidime                      | 1023 | 256 (10.6/10.6)                                                | 1105 | 256 (20.0/20.0) | 619 | 256 (15.8/15.8) | 819 | 256 (17.2/17.2) | 526 | 256 (23.2/23.2) |  |
| Ceftazidime-avibactam            | 964  | 128 (82.7/82.7)                                                | 1052 | 128 (84.8/84.8) | 596 | 128 (83.9/83.9) | 728 | 256 (79.3/79.3) | 485 | 128 (88.5/88.5) |  |
| Ceftriaxone                      | 535  | 32 (4.3/5.8)                                                   | 468  | 64 (4.3/6.4)    | 365 | 32 (4.9/7.7)    | 270 | 64 (2.6/4.4)    | 294 | 64 (4.8/5.1)    |  |
| Ciprofloxacin                    | 488  | 8 (6.6/11.1)                                                   | 637  | 8 (8.0/11.2)    | 254 | 8 (10.6/14.6)   | 549 | 8 (9.8/12.9)    | 232 | 8 (12.5/15.5)   |  |
| Colistin <sup>d,e</sup>          | 939  | 1 (NA/94.6)                                                    | 1005 | 1 (NA/96.5)     | 573 | 1 (NA/96.2)     | 705 | 1 (NA/95.2)     | 474 | 1 (NA/95.6)     |  |
| Gentamicin                       | 488  | 32 (39.6/38.3)                                                 | 637  | 32 (45.4/44.4)  | 254 | 32 (41.3/40.2)  | 549 | 32 (45.9/44.3)  | 232 | 32 (51.3/50.4)  |  |
| Imipenem <sup>f</sup>            | 964  | 16 (65.6/NA)                                                   | 1052 | 16 (72.6/NA)    | 596 | 16 (73.0/NA)    | 728 | 16 (67.9/NA)    | 485 | 16 (79.8/NA)    |  |
| Levofloxacin                     | 1023 | 16 (17.7/28)                                                   | 1105 | 16 (16.4/20.4)  | 619 | 16 (20.2/29.4)  | 819 | 16 (18.0/24.9)  | 526 | 16 (22.4/29.7)  |  |
| Meropenem                        | 1023 | 32 (69.4/73.7)                                                 | 1105 | 32 (76.9/79.5)  | 619 | 32 (76.4/80.6)  | 819 | 32 (73.0/75.3)  | 526 | 32 (82.5/85.6)  |  |
| Piperacillin/tazobactam          | 1023 | 256 (36.5/36.5)                                                | 1105 | 128 (53.6/53.6) | 619 | 256 (50.4/50.4) | 819 | 128 (53.7/53.7) | 526 | 128 (60.3/60.3) |  |

|                                  |      |                 |      |                 |      |                 |      |                 |      |                 |
|----------------------------------|------|-----------------|------|-----------------|------|-----------------|------|-----------------|------|-----------------|
| Tigecycline <sup>g,hi</sup>      | 1005 | 2 (95.2/97.5)   | 1061 | 2 (97.6/95.1)   | 597  | 2 (94.6/96.6)   | 797  | 2 (97.7/96.3)   | 518  | 1 (97.7/96.8)   |
| <b>Europe (N=8807)</b>           |      |                 |      |                 |      |                 |      |                 |      |                 |
| Aztreonam-avibactam <sup>c</sup> | 1819 | 0.25 (99.9)     | 1758 | 0.25 (99.8)     | 1320 | 0.25 (99.9)     | 1330 | 0.25 (100)      | 975  | 0.5 (99.9)      |
| Aztreonam                        | 1819 | 256 (8.4/8.4)   | 1758 | 256 (10.1/10.1) | 1320 | 256 (11.5/11.5) | 1330 | 256 (6.5/6.5)   | 975  | 256 (9.2/9.2)   |
| Amikacin                         | 2148 | 32 (87.2/81.1)  | 2154 | 16 (91.2/86.6)  | 1491 | 16 (90.9/86.2)  | 1735 | 16 (91.4/85)    | 1174 | 16 (90.7/85.0)  |
| Cefepime                         | 2148 | 64 (11.7/16.2)  | 2154 | 64 (12.0/18.0)  | 1491 | 64 (14.8/20.5)  | 1735 | 64 (7.2/12.2)   | 1174 | 64 (15.3/20.8)  |
| Ceftazidime                      | 2148 | 256 (13.6/13.6) | 2154 | 256 (17.2/17.2) | 1491 | 256 (19.1/19.1) | 1735 | 256 (15.5/15.5) | 1174 | 256 (17.2/17.2) |
| Ceftazidime-avibactam            | 1819 | 2 (92.7/92.7)   | 1758 | 2 (94.6/94.6)   | 1320 | 2 (95.5/95.5)   | 1330 | 2 (94.4/94.4)   | 975  | 2 (94.5/94.5)   |
| Ceftriaxone                      | 1263 | 64 (3.6/5.3)    | 1320 | 64 (3.3/4.6)    | 917  | 64 (4.7/6.8)    | 731  | 64 (2.7/3.8)    | 656  | 64 (4.6/6.3)    |
| Ciprofloxacin                    | 885  | 8 (9.3/14.8)    | 834  | 8 (11.8/16.4)   | 574  | 8 (11.9/16.0)   | 1004 | 8 (10.3/14.7)   | 518  | 8 (13.9/19.9)   |
| Colistin <sup>d,e</sup>          | 1764 | 1 (NA/92.4)     | 1700 | 1 (NA/95.1)     | 1238 | 1 (NA/94.6)     | 1292 | 1 (NA/93.7)     | 955  | 1 (NA/94.8)     |
| Gentamicin                       | 885  | 32 (43.7/43.2)  | 834  | 32 (48.9/48)    | 574  | 32 (44.6/44.3)  | 1004 | 32 (44.4/44)    | 518  | 32 (56.8/55.8)  |
| Imipenem <sup>f</sup>            | 1819 | 16 (72.4/NA)    | 1758 | 8 (81.1/NA)     | 1320 | 8 (76.4/NA)     | 1330 | 16 (75/NA)      | 975  | 8 (77.6/NA)     |
| Levofloxacin                     | 2148 | 16 (23.5/33.1)  | 2154 | 16 (22.5/30.8)  | 1491 | 16 (23.3/32.5)  | 1735 | 16 (18.7/26.5)  | 1174 | 16 (27.8/34.6)  |
| Meropenem                        | 2148 | 16 (77.9/85.6)  | 2154 | 8 (86.2/91.2)   | 1491 | 8 (81.2/90.5)   | 1735 | 16 (79.5/86.6)  | 1174 | 16 (81.0/88.1)  |
| Piperacillin/tazobactam          | 2148 | 256 (36.2/36.2) | 2154 | 256 (51.3/51.3) | 1491 | 256 (46.1/46.1) | 1735 | 128 (44.7/44.7) | 1174 | 256 (46.4/46.4) |
| Tigecycline <sup>g,hi</sup>      | 2101 | 2 (96.4/98.3)   | 2097 | 2 (97.1/98.5)   | 1412 | 1 (96.4/98.2)   | 1702 | 2 (96.0/98.7)   | 1155 | 1 (96.4/97.3)   |
| <b>Latin America (N=4115)</b>    |      |                 |      |                 |      |                 |      |                 |      |                 |
| Aztreonam-avibactam <sup>c</sup> | 586  | 0.25 (100)      | 933  | 0.25 (100)      | 678  | 0.5 (99.9)      | 827  | 0.25 (100)      | 679  | 0.25 (100)      |
| Aztreonam                        | 586  | 256 (5.5/5.5)   | 933  | 256 (8.5/8.5)   | 678  | 256 (10.2/10.2) | 827  | 256 (4.8/4.8)   | 679  | 256 (8.1/8.1)   |
| Amikacin                         | 637  | 16 (90.3/83.7)  | 999  | 16 (91.2/85.3)  | 751  | 16 (91/84.6)    | 906  | 32 (86.5/80.9)  | 798  | 16 (92.6/86.3)  |
| Cefepime                         | 637  | 64 (8.2/14.1)   | 999  | 64 (7.9/13.5)   | 751  | 64 (9.1/14.4)   | 906  | 64 (5.4/10.3)   | 798  | 64 (9.7/14.9)   |
| Ceftazidime                      | 637  | 256 (11.8/11.8) | 999  | 256 (18.2/18.2) | 751  | 256 (14.5/14.5) | 906  | 256 (11.7/11.7) | 798  | 256 (16.9/16.9) |
| Ceftazidime-avibactam            | 586  | 2 (94.0/94.0)   | 933  | 2 (95.4/95.4)   | 678  | 16 (90.0/90.0)  | 827  | 4 (92.0/92.0)   | 679  | 2 (95.7/95.7)   |
| Ceftriaxone                      | 289  | 64 (2.8/2.8)    | 497  | 64 (2.4/4.2)    | 425  | 64 (2.4/5.7)    | 329  | 64 (2.1/2.4)    | 471  | 64 (2.3/2.3)    |
| Ciprofloxacin                    | 348  | 8 (5.8/9.5)     | 502  | 8 (8.6/11.8)    | 326  | 8 (8.0/14.4)    | 577  | 8 (9.4/15.4)    | 327  | 8 (9.8/14.4)    |
| Colistin <sup>d,e</sup>          | 573  | 1 (NA/92.8)     | 900  | 1 (NA/96.0)     | 642  | 0.5 (NA/96.9)   | 808  | 1 (NA/94.8)     | 670  | 1 (NA/95.7)     |
| Gentamicin                       | 348  | 32 (37.9/37.4)  | 502  | 32 (40.0/39.0)  | 326  | 32 (31.3/30.4)  | 577  | 32 (38.7/37.8)  | 327  | 32 (42.5/41.3)  |
| Imipenem <sup>f</sup>            | 586  | 16 (76.1/NA)    | 933  | 16 (81.7/NA)    | 678  | 16 (79.1/NA)    | 827  | 16 (77.0/NA)    | 679  | 8 (83.8/NA)     |
| Levofloxacin                     | 637  | 16 (20.1/32.3)  | 999  | 16 (16.2/23.6)  | 751  | 16 (19.7/30.2)  | 906  | 16 (21.2/34.6)  | 798  | 16 (19.9/26.7)  |
| Meropenem                        | 637  | 16 (79.3/85.6)  | 999  | 16 (83.4/89.3)  | 751  | 16 (82.0/88.3)  | 906  | 16 (77.4/84.6)  | 798  | 8 (85.6/91.1)   |
| Piperacillin/tazobactam          | 637  | 128 (43.3/43.3) | 999  | 256 (51.0/51.0) | 751  | 256 (51.1/51.1) | 906  | 128 (44.9/44.9) | 798  | 256 (52.0/52.0) |
| Tigecycline <sup>g,hi</sup>      | 628  | 1 (96.7/98.6)   | 970  | 1 (98.3/98.4)   | 720  | 1 (97.8/97.1)   | 893  | 1 (97.8/99.1)   | 789  | 1 (97.7/97.2)   |
| <b>North America (N=1099)</b>    |      |                 |      |                 |      |                 |      |                 |      |                 |
| Aztreonam-avibactam <sup>c</sup> | 225  | 0.25 (99.6)     | 220  | 0.25 (100)      | 123  | 0.5 (100)       | 237  | 0.25 (100)      | 104  | 0.5 (100)       |
| Aztreonam                        | 225  | 128 (9.8/9.8)   | 220  | 128 (17.3/17.3) | 123  | 128 (17.1/17.1) | 237  | 128 (9.3/9.3)   | 104  | 128 (14.4/14.4) |
| Amikacin                         | 265  | 16 (92.5/84.2)  | 270  | 8 (97.0/92.2)   | 137  | 8 (99.3/92.7)   | 300  | 8 (97.3/93.3)   | 120  | 8 (95.0/93.3)   |
| Cefepime                         | 265  | 64 (21.9/28.3)  | 270  | 64 (22.6/31.5)  | 137  | 64 (25.6/38.7)  | 300  | 64 (10.0/16.3)  | 120  | 64 (25.0/33.3)  |

|                              |     |                    |     |                     |     |                     |     |                     |     |                    |
|------------------------------|-----|--------------------|-----|---------------------|-----|---------------------|-----|---------------------|-----|--------------------|
| Ceftazidime                  | 265 | 128<br>(14.3/14.3) | 270 | 128 (24.8/24.8)     | 137 | 128 (23.4/23.4)     | 300 | 128<br>(18.3/18.3)  | 120 | 128<br>(23.3/23.3) |
| Ceftazidime-avi-<br>bactam   | 225 | 2 (97.3/97.3)      | 220 | 1 (98.2/98.2)       | 123 | 1 (97.6/97.6)       | 237 | 1 (100/100)         | 104 | 2 (97.1/97.1)      |
| Ceftriaxone                  | 126 | 64 (10.3/11.9)     | 132 | 64 (7.6/11.4)       | 72  | 64 (16.7/19.4)      | 82  | 64 (1.2/3.7)        | 69  | 64 (8.7/11.6)      |
| Ciprofloxacin                | 139 | 8 (12.2/19.4)      | 138 | 8 (13.8/20.3)       | 65  | 8 (10.8/16.9)       | 218 | 8 (10.1/17.9)       | 51  | 8 (15.7/19.6)      |
| Colistin <sup>d,e</sup>      | 220 | 0.5 (NA/96.4)      | 205 | 0.5 (NA/97.6)       | 114 | 0.5 (NA/97.4)       | 234 | 0.5 (NA/98.3)       | 103 | 0.5 (NA/99.0)      |
| Gentamicin                   | 139 | 32 (54.7/52.5)     | 138 | 32 (65.2/64.5)      | 65  | 32 (53.9/53.9)      | 218 | 32 (57.3/56.9)      | 51  | 32 (54.9/54.9)     |
| Imipenem <sup>f</sup>        | 225 | 4 (84.9/NA)        | 220 | 2 (88.2/NA)         | 123 | 2 (88.6/NA)         | 237 | 1 (92.4/95.8)       | 104 | 2 (84.6/NA)        |
| Levofloxacin                 | 265 | 16 (28.3/39.3)     | 270 | 16 (27.8/35.6)      | 137 | 16 (32.1/42.3)      | 300 | 16 (20.7/28.0)      | 120 | 16 (25.8/27.5)     |
| Meropenem                    | 265 | 2 (89.4/93.6)      | 270 | 0.25<br>(94.4/98.2) | 137 | 0.25<br>(94.2/98.5) | 300 | 0.12<br>(95.3/98.0) | 120 | 4 (87.5/92.5)      |
| Piperacillin/tazo-<br>bactam | 265 | 128<br>(49.4/49.4) | 270 | 128 (66.7/66.7)     | 137 | 128 (61.3/61.3)     | 300 | 128<br>(68.0/68.0)  | 120 | 256<br>(53.3/53.3) |
| Tigecycline <sup>g,hi</sup>  | 260 | 1 (98.1/99.0)      | 256 | 1 (98.1/94.6)       | 128 | 1 (98.4/100)        | 297 | 1 (98.0/98.4)       | 119 | 1 (98.3/94.4)      |

<sup>a</sup>Not all drugs in the panel were tested every year. <sup>b</sup>Data includes percentage isolates susceptible at increased exposure. <sup>c</sup>No breakpoints available from CLSI and EUCAST. Values expressed are indicative of the cumulative percentage of isolates inhibited at ≤8 mg/L for comparison purposes. <sup>d</sup>Susceptible category for colistin not available for CLSI breakpoints (only intermediate and resistant isolates are available). <sup>e</sup>Data for colistin do not include isolates of *Morganella morganii*, *Proteus hauseri*, *Proteus mirabilis*, *Proteus vulgaris*, *Providencia alcalifaciens*, *Providencia rettgeri*, *Providencia spp*, *Providencia stuartii*, and *Serratia marcescens* because of their intrinsic resistance. <sup>f</sup>Data for imipenem not available per EUCAST. <sup>g</sup>Data for tigecycline do not include isolates of *Morganella morganii*, *Proteus hauseri*, *Proteus mirabilis*, *Proteus vulgaris*, *Providencia alcalifaciens*, *Providencia rettgeri*, *Providencia spp*, and *Providencia stuartii* due to their intrinsic resistance. <sup>h</sup>Data for tigecycline was calculated based on FDA approved breakpoints for CLSI. <sup>i</sup>EUCAST data for susceptibility to tigecycline are limited to *E. coli* and *C. koseri*; denominator (n): AfME: RTI=85, UTI=246, SSTI=218, BSI=152, IAI=101; APAC: RTI= 240, UTI=628, SSTI=290, BSI=435, IAI=312; Europe: RTI=457, UTI=732, SSTI=509, BSI=623, IAI=509; LATAM: RTI=141, UTI= 425, SSTI=350, BSI=315, IAI=435; North America: RTI= 100, UTI=148, SSTI=65, BSI=186, IAI=71. BSI, bloodstream infections; IAI, intra-abdominal infection; MIC, minimum inhibitory concentration; N, total number of isolates; n, number of isolates from infection sources; NA, not available; RTI, respiratory tract infection; SSTI, skin and soft tissue infection; UTI, urinary tract infection.

**Table S7.** *In vitro* activity of ATM-AVI and comparator agents tested against carbapenem-resistant Enterobacterales (CRE) isolates across regions stratified by wards from 2016–2020.

|                                                            | ICU            |                                       |                |                                                  | Non-ICU        |                                        |                |                                                     |
|------------------------------------------------------------|----------------|---------------------------------------|----------------|--------------------------------------------------|----------------|----------------------------------------|----------------|-----------------------------------------------------|
|                                                            | CLSI           |                                       | EUCAST         |                                                  | CLSI           |                                        | EUCAST         |                                                     |
|                                                            | n <sup>a</sup> | MIC <sub>90</sub><br>(μg/mL)<br>(% S) | n <sup>a</sup> | MIC <sub>90</sub> (mg/L)/<br>(% S <sup>b</sup> ) | n <sup>a</sup> | MIC <sub>90</sub><br>(μg/mL)/<br>(% S) | n <sup>a</sup> | MIC <sub>90</sub><br>(mg/L)/<br>(% S <sup>b</sup> ) |
| <b>Africa-Middle East<br/>(CLSI/EUCAST,<br/>N=337/252)</b> |                |                                       |                |                                                  |                |                                        |                |                                                     |
| Aztreonam-avibactam <sup>c</sup>                           | 105            | 0.5 (100)                             | 83             | 0.5 (100)                                        | 172            | 0.5 (100)                              | 118            | 0.5 (100)                                           |
| Aztreonam                                                  | 105            | 256 (13.3)                            | 83             | 256 (9.6)                                        | 172            | 256 (16.9)                             | 118            | 256 (16.1)                                          |
| Amikacin                                                   | 115            | 128 (59.1)                            | 89             | 128 (44.9)                                       | 176            | 128 (62.5)                             | 121            | 128 (41.3)                                          |
| Cefepime                                                   | 115            | 64 (1.7)                              | 89             | 64 (3.4)                                         | 176            | 64 (5.7)                               | 121            | 64 (3.3)                                            |
| Ceftazidime                                                | 115            | 256 (3.5)                             | 89             | 256 (4.5)                                        | 176            | 256 (4.6)                              | 121            | 256 (4.1)                                           |
| Ceftazidime-avibactam                                      | 105            | 256 (46.7)                            | 83             | 256 (49.4)                                       | 172            | 256 (42.4)                             | 118            | 256 (40.7)                                          |
| Ceftriaxone                                                | 21             | 64 (0)                                | 14             | 64 (0)                                           | 32             | 64 (0)                                 | 26             | 64 (3.9)                                            |
| Ciprofloxacin                                              | 94             | 8 (8.5)                               | 75             | 8 (10.7)                                         | 144            | 8 (4.9)                                | 95             | 8 (10.5)                                            |
| Colistin <sup>d,e</sup>                                    | 95             | 2 (NA)                                | 79             | 2 (92.4)                                         | 156            | 1 (NA)                                 | 111            | 1 (96.4)                                            |

|                                                        |     |            |     |            |      |            |     |            |
|--------------------------------------------------------|-----|------------|-----|------------|------|------------|-----|------------|
| Gentamicin                                             | 94  | 32 (28.7)  | 75  | 32 (29.3)  | 144  | 32 (36.8)  | 95  | 32 (33.7)  |
| Imipenem <sup>f</sup>                                  | 105 | 16 (1.0)   | 83  | 16 (13.3)  | 172  | 16 (2.3)   | 118 | 16 (8.5)   |
| Levofloxacin                                           | 115 | 16 (15.7)  | 89  | 16 (16.9)  | 176  | 16 (11.4)  | 121 | 16 (12.4)  |
| Meropenem                                              | 115 | 32 (0)     | 89  | 32 (0)     | 176  | 32 (0)     | 121 | 32 (0)     |
| Piperacillin/tazobactam                                | 115 | 256 (0)    | 89  | 256 (0)    | 176  | 256 (0)    | 121 | 256 (0)    |
| Tigecycline <sup>g,h,i</sup>                           | 112 | 2 (92.0)   | 88  | 2 (100)    | 162  | 2 (94.4)   | 114 | 2 (100)    |
| <b>Asia-Pacific<br/>(CLSI/EUCAST,<br/>N=1691/1531)</b> |     |            |     |            |      |            |     |            |
| Aztreonam-avibactam <sup>c</sup>                       | 499 | 2 (96.8)   | 461 | 2 (97.4)   | 594  | 2 (98.7)   | 530 | 2 (98.7)   |
| Aztreonam                                              | 626 | 256 (6.6)  | 577 | 256 (5.9)  | 785  | 256 (9.6)  | 709 | 256 (8.2)  |
| Amikacin                                               | 653 | 128 (28.6) | 602 | 128 (22.3) | 831  | 128 (48.9) | 744 | 128 (40.9) |
| Cefepime                                               | 653 | 64 (0.2)   | 602 | 64 (0.2)   | 831  | 64 (0.8)   | 744 | 64 (0.9)   |
| Ceftazidime                                            | 653 | 256 (1.4)  | 602 | 256 (1.0)  | 831  | 256 (2.2)  | 744 | 256 (1.9)  |
| Ceftazidime-avibactam                                  | 626 | 256 (42.2) | 577 | 256 (42.3) | 785  | 256 (46.2) | 709 | 256 (45.4) |
| Ceftriaxone                                            | 86  | 64 (0)     | 71  | 64 (0)     | 184  | 64 (0)     | 145 | 64 (0)     |
| Ciprofloxacin                                          | 567 | 8 (2.5)    | 531 | 8 (3.0)    | 647  | 8 (3.6)    | 599 | 8 (5.0)    |
| Colistin <sup>d,e</sup>                                | 570 | 4 (NA)     | 532 | 4 (89.9)   | 735  | 2 (NA)     | 668 | 2 (91.2)   |
| Gentamicin                                             | 567 | 32 (16.4)  | 531 | 32 (15.1)  | 647  | 32 (28.3)  | 599 | 32 (26.0)  |
| Imipenem <sup>f</sup>                                  | 626 | 16 (0.6)   | 577 | 16 (NA)    | 785  | 16 (2.9)   | 709 | 16 (5.1)   |
| Levofloxacin                                           | 653 | 16 (4.4)   | 602 | 16 (5.8)   | 831  | 16 (6.6)   | 744 | 16 (8.1)   |
| Meropenem                                              | 653 | 32 (0)     | 602 | 32 (0)     | 831  | 32 (0)     | 744 | 32 (0)     |
| Piperacillin/tazobactam                                | 653 | 256 (1.2)  | 602 | 256 (0.3)  | 831  | 256 (0.8)  | 744 | 256 (0.3)  |
| Tigecycline <sup>g,h,i</sup>                           | 612 | 2 (93.3)   | 569 | 2 (89.9)   | 805  | 2 (93.2)   | 724 | 2 (81.5)   |
| <b>Europe<br/>(CLSI/EUCAST,<br/>N=2241/1649)</b>       |     |            |     |            |      |            |     |            |
| Aztreonam-avibactam <sup>c</sup>                       | 701 | 0.5 (99.7) | 550 | 0.5 (99.6) | 971  | 0.5 (99.7) | 692 | 0.5 (99.7) |
| Aztreonam                                              | 701 | 256 (10.7) | 550 | 256 (8.7)  | 971  | 256 (9.1)  | 692 | 256 (7.1)  |
| Amikacin                                               | 824 | 128 (56.9) | 637 | 128 (33.3) | 1120 | 128 (62.9) | 801 | 128 (40.3) |
| Cefepime                                               | 824 | 64 (3.6)   | 637 | 64 (4.1)   | 1120 | 64 (3.0)   | 801 | 64 (2.6)   |
| Ceftazidime                                            | 824 | 256 (5.0)  | 637 | 256 (4.2)  | 1120 | 256 (3.8)  | 801 | 256 (2.4)  |
| Ceftazidime-avibactam                                  | 701 | 256 (68.5) | 550 | 256 (67.5) | 971  | 256 (72.7) | 692 | 256 (72.0) |
| Ceftriaxone                                            | 306 | 64 (1.0)   | 226 | 64 (0)     | 461  | 64 (0.9)   | 315 | 64 (0.6)   |
| Ciprofloxacin                                          | 518 | 8 (4.3)    | 411 | 8 (4.1)    | 659  | 8 (5.2)    | 486 | 8 (3.5)    |
| Colistin <sup>d,e</sup>                                | 657 | 16 (NA)    | 517 | 16 (74.5)  | 917  | 16 (NA)    | 667 | 16 (77.2)  |
| Gentamicin                                             | 518 | 32 (34.2)  | 411 | 32 (28.7)  | 659  | 32 (37.9)  | 486 | 32 (33.7)  |
| Imipenem <sup>f</sup>                                  | 701 | 16 (1.6)   | 550 | 16 (7.1)   | 971  | 16 (3.4)   | 692 | 16 (5.9)   |
| Levofloxacin                                           | 824 | 16 (7.2)   | 637 | 16 (5.0)   | 1120 | 16 (6.3)   | 801 | 16 (5.4)   |
| Meropenem                                              | 824 | 32 (0)     | 637 | 32 (0)     | 1120 | 32 (0)     | 801 | 32 (0)     |
| Piperacillin/tazobactam                                | 824 | 256 (0.4)  | 637 | 256 (0.5)  | 1120 | 256 (1.3)  | 801 | 256 (0.5)  |
| Tigecycline <sup>g,h,i</sup>                           | 797 | 2 (93.9)   | 617 | 2 (90.0)   | 1076 | 2 (93.4)   | 782 | 2 (81.0)   |
| <b>Latin America<br/>(CLSI/EUCAST,<br/>N=1133/864)</b> |     |            |     |            |      |            |     |            |
| Aztreonam-avibactam <sup>c</sup>                       | 379 | 0.5 (100)  | 292 | 0.5 (100)  | 461  | 0.5 (99.8) | 332 | 0.5 (99.7) |
| Aztreonam                                              | 379 | 256 (6.9)  | 292 | 256 (5.1)  | 461  | 256 (9.8)  | 332 | 256 (8.7)  |
| Amikacin                                               | 425 | 128 (66.4) | 333 | 128 (48.7) | 540  | 128 (69.8) | 398 | 128 (51.3) |
| Cefepime                                               | 425 | 64 (2.1)   | 333 | 64 (1.2)   | 540  | 64 (2.6)   | 398 | 64 (1.3)   |
| Ceftazidime                                            | 425 | 256 (3.3)  | 333 | 256 (1.5)  | 540  | 256 (6.3)  | 398 | 256 (3.3)  |
| Ceftazidime-avibactam                                  | 379 | 256 (72.3) | 292 | 256 (73.0) | 461  | 256 (69.2) | 332 | 256 (66.3) |

|                                                      |     |            |     |                        |     |            |     |            |
|------------------------------------------------------|-----|------------|-----|------------------------|-----|------------|-----|------------|
| Ceftriaxone                                          | 154 | 64 (0)     | 127 | 64 (0)                 | 201 | 64 (0.5)   | 152 | 64 (0.7)   |
| Ciprofloxacin                                        | 271 | 8 (13.7)   | 206 | 8 (11.7)               | 339 | 8 (10.0)   | 246 | 8 (7.3)    |
| Colistin <sup>d,e</sup>                              | 350 | 16 (NA)    | 273 | 16 (75.5)              | 427 | 16 (NA)    | 308 | 16 (77.0)  |
| Gentamicin                                           | 271 | 32 (36.2)  | 206 | 32 (34.0)              | 339 | 32 (43.1)  | 246 | 32 (37.8)  |
| Imipenem <sup>f</sup>                                | 379 | 16 (1.3)   | 292 | 16 (2.4)               | 461 | 16 (2)     | 332 | 16 (1.8)   |
| Levofloxacin                                         | 425 | 16 (14.6)  | 333 | 16 (16.5)              | 540 | 16 (15.7)  | 398 | 16 (18.1)  |
| Meropenem                                            | 425 | 32 (0)     | 333 | 32 (0)                 | 540 | 32 (0)     | 398 | 32 (0)     |
| Piperacillin/tazobactam                              | 425 | 256 (0.7)  | 333 | 256 (0.6)              | 540 | 256 (0.9)  | 398 | 256 (0.5)  |
| Tigecycline <sup>g,h,i</sup>                         | 411 | 2 (94.4)   | 327 | 2 (87.5)               | 522 | 2 (95.6)   | 386 | 2 (85.0)   |
| <b>North America<br/>(CLSI/EUCAST,<br/>N=174/92)</b> |     |            |     |                        |     |            |     |            |
| Aztreonam-avibactam <sup>c</sup>                     | 31  | 0.5 (100)  | 15  | 0.5 (100)              | 90  | 1 (97.8)   | 48  | 1 (97.9)   |
| Aztreonam                                            | 31  | 256 (6.5)  | 15  | 256 (0)                | 90  | 256 (12.2) | 48  | 256 (12.5) |
| Amikacin                                             | 41  | 32 (82.9)  | 20  | 64 (70.0)              | 104 | 64 (81.7)  | 56  | 128 (60.7) |
| Cefepime                                             | 41  | 64 (9.8)   | 20  | 64 (10.0)              | 104 | 64 (7.7)   | 56  | 64 (7.1)   |
| Ceftazidime                                          | 41  | 256 (7.3)  | 20  | 256 (10.0)             | 104 | 256 (12.5) | 56  | 256 (10.7) |
| Ceftazidime-avibactam                                | 31  | 256 (83.9) | 15  | 128 (86.7)             | 90  | 256 (82.2) | 48  | 256 (77.1) |
| Ceftriaxone                                          | 13  | 64 (7.7)   | 8   | NA <sup>i</sup> (12.5) | 26  | 64 (7.7)   | 13  | 64 (7.7)   |
| Ciprofloxacin                                        | 28  | 8 (17.9)   | 12  | 8 (16.7)               | 78  | 8 (15.4)   | 43  | 8 (14.0)   |
| Colistin <sup>d,e</sup>                              | 29  | 8 (NA)     | 13  | 8 (84.6)               | 82  | 1 (NA)     | 42  | 1 (90.5)   |
| Gentamicin                                           | 28  | 32 (60.7)  | 12  | 32 (50.0)              | 78  | 32 (44.9)  | 43  | 32 (37.2)  |
| Imipenem <sup>f</sup>                                | 31  | 16 (6.5)   | 15  | 16 (NA)                | 90  | 16 (8.9)   | 48  | 16 (14.6)  |
| Levofloxacin                                         | 41  | 16 (24.4)  | 20  | 16 (0)                 | 104 | 16 (19.2)  | 56  | 16 (14.3)  |
| Meropenem                                            | 41  | 32 (0)     | 20  | 32 (20.0)              | 104 | 32 (0)     | 56  | 32 (0)     |
| Piperacillin/tazobactam                              | 41  | 256 (4.9)  | 20  | 256 (0)                | 104 | 256 (2.9)  | 56  | 256 (3.6)  |
| Tigecycline <sup>g,h,i</sup>                         | 41  | 2 (95.1)   | 20  | 2 (NA)                 | 103 | 2 (90.3)   | 56  | 2 (0)      |

<sup>a</sup> Data includes percentage isolates susceptible at increased exposure. <sup>b</sup> Not all drugs in the panel were tested every year. <sup>c</sup> No breakpoints available from CLSI and EUCAST. Values expressed are indicative of the cumulative percentage of isolates inhibited at  $\leq 8$  mg/L for comparison purposes. <sup>d</sup> Susceptible category for colistin not available for CLSI breakpoints (only intermediate and resistant isolates are available). <sup>e</sup> Data for colistin do not include isolates of *Morganella morganii*, *Proteus hauseri*, *Proteus mirabilis*, *Proteus vulgaris*, *Providencia alcalifaciens*, *Providencia rettgeri*, *Providencia* spp, *Providencia stuartii*, and *Serratia marcescens* because of their intrinsic resistance. <sup>f</sup> Data for imipenem not available per EUCAST. <sup>g</sup> Data for tigecycline do not include isolates of *Morganella morganii*, *Proteus hauseri*, *Proteus mirabilis*, *Proteus vulgaris*, *Providencia alcalifaciens*, *Providencia rettgeri*, *Providencia* spp, and *Providencia stuartii* due to their intrinsic resistance. <sup>h</sup> Data for tigecycline was calculated based on FDA approved breakpoints for CLSI. <sup>i</sup> EUCAST data for susceptibility to tigecycline are limited to *E. coli* and *C. Koseri*; denominator (n): AfME: ICU= 2, non-ICU= 3; APAC: ICU= 79, non-ICU= 135; Europe: ICU= 10, non-ICU= 21; LATAM: ICU= 8, non-ICU= 20; North America: ICU= NA, non-ICU= 2. <sup>j</sup> The MIC<sub>90</sub> has been presented as NA considering the n<10. ICU, intensive care unit; MIC, minimum inhibitory concentration; N, total number of isolates; n, number of isolates from wards; NA, not available.



**Table S8.** *In vitro* activity of ATM-AVI and comparator agents tested against carbapenem-resistant Enterobacterales (CRE) isolates across regions stratified by infection sources from 2016–2020.

|                                                            | RTI               |                  |                   |                               | UTI               |                     |                   |                               | SSTI              |                  |                   |                               |
|------------------------------------------------------------|-------------------|------------------|-------------------|-------------------------------|-------------------|---------------------|-------------------|-------------------------------|-------------------|------------------|-------------------|-------------------------------|
|                                                            | CLSI              |                  | EUCAST            |                               | CLSI              |                     | EUCAST            |                               | CLSI              |                  | EUCAST            |                               |
|                                                            | MIC <sub>90</sub> |                  | MIC <sub>90</sub> |                               | MIC <sub>90</sub> |                     | MIC <sub>90</sub> |                               | MIC <sub>90</sub> |                  | MIC <sub>90</sub> |                               |
|                                                            | n <sup>a</sup>    | (μg/mL)<br>(% S) | n <sup>a</sup>    | (mg/L)<br>(% S <sup>b</sup> ) | n <sup>a</sup>    | (μg/mL)<br>(% S)    | n <sup>a</sup>    | (mg/L)<br>(% S <sup>b</sup> ) | n <sup>a</sup>    | (μg/mL)<br>(% S) | n <sup>a</sup>    | (mg/L)<br>(% S <sup>b</sup> ) |
| <b>Africa-Middle East<br/>(CLSI/EUCAST,<br/>N=337/252)</b> |                   |                  |                   |                               |                   |                     |                   |                               |                   |                  |                   |                               |
| Aztreonam-avibac-<br>tam <sup>c</sup>                      | 63                | 0.5 (100)        | 50                | 0.5 (100)                     | 74                | 1 (100)             | 49                | 1 (100)                       | 59                | 0.5 (98.3)       | 44                | 0.5 (97.7)                    |
| Aztreonam                                                  | 63                | 256 (17.5)       | 50                | 256 (14.0)                    | 74                | 256 (23.0)          | 49                | 256 (26.5)                    | 59                | 256 (10.2)       | 44                | 256 (11.4)                    |
| Amikacin                                                   | 68                | 128 (60.3)       | 54                | 128 (44.4)                    | 76                | 128 (75.0)          | 51                | 128 (60.8)                    | 63                | 128 (52.4)       | 44                | 128 (40.9)                    |
| Cefepime                                                   | 68                | 64 (5.9)         | 54                | 64 (3.7)                      | 76                | 64 (1.3)            | 51                | 64 (3.9)                      | 63                | 64 (3.2)         | 44                | 64 (2.3)                      |
| Ceftazidime                                                | 68                | 256 (10.3)       | 54                | 256 (9.3)                     | 76                | 256 (1.3)           | 51                | 256 (2.0)                     | 63                | 256 (1.6)        | 44                | 256 (0)                       |
| Ceftazidime-avibac-<br>tam                                 | 63                | 256 (65.1)       | 50                | 256 (60.0)                    | 74                | 256 (23.0)          | 49                | 256 (18.4)                    | 59                | 256 (35.6)       | 44                | 256 (40.9)                    |
| Ceftriaxone                                                | 16                | 64 (0)           | 12                | 64 (0)                        | 8                 | NA <sup>d</sup> (0) | 5                 | NA <sup>d</sup> (0)           | 15                | 64 (0)           | 10                | 32 (0)                        |
| Ciprofloxacin                                              | 52                | 8 (7.7)          | 42                | 8 (4.8)                       | 68                | 8 (2.9)             | 46                | 8 (6.5)                       | 48                | 8 (4.2)          | 34                | 8 (11.8)                      |
| Colistin <sup>e,f</sup>                                    | 60                | 1 (NA)           | 49                | 1 (93.9)                      | 59                | 8 (NA)              | 41                | 16 (85.4)                     | 54                | 1 (NA)           | 40                | 2 (92.5)                      |
| Gentamicin                                                 | 52                | 32 (38.5)        | 42                | 32 (38.1)                     | 68                | 32 (26.5)           | 46                | 32 (26.1)                     | 48                | 32 (33.3)        | 34                | 32 (26.5)                     |
| Imipenem <sup>g</sup>                                      | 63                | 16 (4.8)         | 50                | 16 (18)                       | 74                | 16 (1.4)            | 49                | 16 (6.1)                      | 59                | 16 (1.7)         | 44                | 16 (9.1)                      |
| Levofloxacin                                               | 68                | 16 (13.2)        | 54                | 16 (11.1)                     | 76                | 16 (15.8)           | 51                | 16 (19.6)                     | 63                | 16 (9.5)         | 44                | 16 (13.6)                     |
| Meropenem                                                  | 68                | 32 (0)           | 54                | 32 (0)                        | 76                | 32 (0)              | 51                | 32 (0)                        | 63                | 32 (0)           | 44                | 32 (0)                        |
| Piperacillin/tazobac-<br>tam                               | 68                | 256 (0)          | 54                | 256 (0)                       | 76                | 128 (0)             | 51                | 128 (0)                       | 63                | 256 (0)          | 44                | 256 (0)                       |
| Tigecycline <sup>h,i,j</sup>                               | 67                | 4 (89.6)         | 54                | 2 (NA)                        | 65                | 2 (95.4)            | 45                | 2 (100)                       | 58                | 2 (93.1)         | 40                | 4 (100)                       |
| <b>Asia-Pacific<br/>(CLSI/EUCAST,<br/>N=1691/1531)</b>     |                   |                  |                   |                               |                   |                     |                   |                               |                   |                  |                   |                               |
| Aztreonam-avibac-<br>tam <sup>c</sup>                      | 375               | 2 (97.9)         | 335               | 2 (97.9)                      | 303               | 4 (97.7)            | 271               | 4 (97.4)                      | 160               | 2 (97.5)         | 140               | 2 (98.6)                      |
| Aztreonam                                                  | 503               | 256 (5.2)        | 451               | 256 (3.3)                     | 380               | 256 (11.3)          | 342               | 256 (9.1)                     | 192               | 256 (9.9)        | 172               | 256 (8.1)                     |
| Amikacin                                                   | 536               | 128 (39.9)       | 479               | 128 (32.4)                    | 398               | 128 (34.4)          | 356               | 128 (26.1)                    | 206               | 128 (46.1)       | 184               | 128 (36.4)                    |
| Cefepime                                                   | 536               | 64 (0.6)         | 479               | 64 (0.8)                      | 398               | 64 (1.3)            | 356               | 64 (0.6)                      | 206               | 64 (0.5)         | 184               | 64 (0.5)                      |
| Ceftazidime                                                | 536               | 256 (2.1)        | 479               | 256 (1.3)                     | 398               | 256 (1.5)           | 356               | 256 (0.8)                     | 206               | 256 (2.9)        | 184               | 256 (2.2)                     |
| Ceftazidime-avibac-<br>tam                                 | 503               | 256 (56.1)       | 451               | 256 (56.8)                    | 380               | 256 (35.5)          | 342               | 256 (33.9)                    | 192               | 256 (38.5)       | 172               | 256 (37.8)                    |
| Ceftriaxone                                                | 122               | 64 (0)           | 98                | 64 (0)                        | 74                | 64 (0)              | 56                | 64 (0)                        | 45                | 64 (0)           | 36                | 64 (0)                        |
| Ciprofloxacin                                              | 414               | 8 (2.7)          | 381               | 8 (3.2)                       | 324               | 8 (2.8)             | 300               | 8 (2.7)                       | 161               | 8 (5.0)          | 148               | 8 (0)                         |
| Colistin <sup>e,f</sup>                                    | 470               | 4 (NA)           | 428               | 2 (90.4)                      | 338               | 2 (NA)              | 307               | 1 (92.5)                      | 180               | 2 (NA)           | 164               | 2 (92.1)                      |
| Gentamicin                                                 | 414               | 32 (22.7)        | 381               | 32 (20.0)                     | 324               | 32 (15.1)           | 300               | 32 (14.0)                     | 161               | 32 (26.1)        | 148               | 32 (88.4)                     |
| Imipenem <sup>g</sup>                                      | 503               | 16 (1.0)         | 451               | 16 (2.7)                      | 380               | 16 (2.1)            | 342               | 16 (6.1)                      | 192               | 16 (0.5)         | 172               | 16 (23.0)                     |
| Levofloxacin                                               | 536               | 16 (5.4)         | 479               | 16 (6.9)                      | 398               | 16 (4.8)            | 356               | 16 (4.8)                      | 206               | 16 (7.8)         | 184               | 16 (9.2)                      |
| Meropenem                                                  | 536               | 32 (0)           | 479               | 32 (0)                        | 398               | 32 (0)              | 356               | 32 (0)                        | 206               | 32 (0)           | 184               | 32 (0)                        |
| Piperacillin/tazobac-<br>tam                               | 536               | 256 (1.3)        | 479               | 256 (0)                       | 398               | 256 (1.3)           | 356               | 256 (0)                       | 206               | 256 (1.5)        | 184               | 256 (0.5)                     |
| Tigecycline <sup>h,i,j</sup>                               | 528               | 2 (92.6)         | 477               | 2 (76.7)                      | 362               | 2 (93.7)            | 325               | 2 (86.6)                      | 195               | 4 (89.2)         | 177               | 4 (88.5)                      |

|                                                                    |     |            |     |            |     |            |     |            |     |            |     |            |
|--------------------------------------------------------------------|-----|------------|-----|------------|-----|------------|-----|------------|-----|------------|-----|------------|
| <b>Europe</b><br><b>(CLSI/EUCAST,</b><br><b>N=2241/1649)</b>       |     |            |     |            |     |            |     |            |     |            |     |            |
| Aztreonam-avibactam <sup>c</sup>                                   | 530 | 0.5 (99.6) | 397 | 0.5 (99.5) | 345 | 0.5 (99.7) | 253 | 0.5 (99.6) | 331 | 0.5 (99.7) | 215 | 1 (99.5)   |
| Aztreonam                                                          | 530 | 256 (9.3)  | 397 | 256 (6.8)  | 345 | 256 (14.8) | 253 | 256 (13.0) | 331 | 256 (12.1) | 215 | 256 (9.8)  |
| Amikacin                                                           | 607 | 128 (57.5) | 456 | 128 (38.2) | 394 | 128 (61.4) | 286 | 128 (37.8) | 381 | 128 (66.7) | 244 | 128 (42.2) |
| Cefepime                                                           | 607 | 64 (3.6)   | 456 | 64 (2.9)   | 394 | 64 (3.1)   | 286 | 64 (2.5)   | 381 | 64 (4.2)   | 244 | 64 (3.7)   |
| Ceftazidime                                                        | 607 | 256 (5.3)  | 456 | 256 (3.5)  | 394 | 256 (4.3)  | 286 | 256 (2.8)  | 381 | 256 (6)    | 244 | 256 (3.7)  |
| Ceftazidime-avibactam                                              | 530 | 256 (69.3) | 397 | 256 (67.0) | 345 | 256 (63.5) | 253 | 256 (61.3) | 331 | 256 (76.1) | 215 | 256 (74.0) |
| Ceftriaxone                                                        | 254 | 64 (1.2)   | 187 | 64 (0.5)   | 151 | 64 (1.3)   | 102 | 64 (1.0)   | 168 | 64 (1.2)   | 99  | 64 (1.0)   |
| Ciprofloxacin                                                      | 353 | 8 (4.3)    | 269 | 8 (4.1)    | 243 | 8 (4.9)    | 184 | 8 (2.2)    | 213 | 8 (5.6)    | 145 | 8 (4.8)    |
| Colistin <sup>e,f</sup>                                            | 505 | 16 (NA)    | 381 | 16 (73.8)  | 316 | 16 (NA)    | 235 | 16 (72.3)  | 307 | 16 (NA)    | 199 | 16 (75.9)  |
| Gentamicin                                                         | 353 | 32 (35.4)  | 269 | 32 (31.6)  | 243 | 32 (37.5)  | 184 | 32 (30.4)  | 213 | 32 (41.8)  | 145 | 32 (40.0)  |
| Imipenem <sup>g</sup>                                              | 530 | 16 (2.1)   | 397 | 16 (6.3)   | 345 | 16 (3.8)   | 253 | 16 (8.7)   | 331 | 16 (4.5)   | 215 | 16 (6.5)   |
| Levofloxacin                                                       | 607 | 16 (6.4)   | 456 | 16 (4.8)   | 394 | 16 (6.9)   | 286 | 16 (7.7)   | 381 | 16 (8.9)   | 244 | 16 (5.7)   |
| Meropenem                                                          | 607 | 32 (0)     | 456 | 32 (0)     | 394 | 32 (0)     | 286 | 32 (0)     | 381 | 32 (0)     | 244 | 32 (0)     |
| Piperacillin/tazobactam                                            | 607 | 256 (1.2)  | 456 | 256 (0.7)  | 394 | 256 (1.3)  | 286 | 256 (1.1)  | 381 | 256 (1.1)  | 244 | 256 (0)    |
| Tigecycline <sup>h,i,j</sup>                                       | 594 | 2 (93.9)   | 448 | 2 (71.4)   | 368 | 2 (93.8)   | 270 | 2 (90.0)   | 362 | 2 (92.5)   | 231 | 2 (62.5)   |
| <b>Latin America</b><br><b>(CLSI/EUCAST,</b><br><b>N=1133/864)</b> |     |            |     |            |     |            |     |            |     |            |     |            |
| Aztreonam-avibactam <sup>c</sup>                                   | 180 | 0.5 (100)  | 143 | 0.5 (100)  | 214 | 0.5 (100)  | 160 | 0.5 (100)  | 167 | 0.5 (100)  | 119 | 0.5 (100)  |
| Aztreonam                                                          | 180 | 256 (5.0)  | 143 | 256 (4.2)  | 214 | 256 (15.4) | 160 | 256 (13.8) | 167 | 256 (13.2) | 119 | 256 (12.6) |
| Amikacin                                                           | 207 | 128 (71.0) | 168 | 128 (58.3) | 241 | 128 (63.9) | 181 | 128 (49.7) | 187 | 128 (65.2) | 136 | 128 (44.1) |
| Cefepime                                                           | 207 | 64 (3.4)   | 168 | 64 (1.8)   | 241 | 64 (2.9)   | 181 | 64 (1.1)   | 187 | 64 (2.7)   | 136 | 64 (2.9)   |
| Ceftazidime                                                        | 207 | 256 (1.9)  | 168 | 256 (1.2)  | 241 | 256 (4.6)  | 181 | 256 (2.8)  | 187 | 256 (8.0)  | 136 | 256 (4.4)  |
| Ceftazidime-avibactam                                              | 180 | 128 (78.9) | 143 | 128 (78.3) | 214 | 256 (67.8) | 160 | 256 (67.5) | 167 | 256 (53.9) | 119 | 256 (47.1) |
| Ceftriaxone                                                        | 63  | 64 (0)     | 53  | 64 (0)     | 94  | 64 (0)     | 69  | 64 (0)     | 70  | 64 (1.4)   | 51  | 64 (2.0)   |
| Ciprofloxacin                                                      | 144 | 8 (4.2)    | 115 | 8 (4.4)    | 147 | 8 (8.2)    | 112 | 8 (5.4)    | 117 | 8 (11.1)   | 85  | 8 (12.9)   |
| Colistin <sup>e,f</sup>                                            | 167 | 16 (NA)    | 133 | 16 (72.9)  | 191 | 16 (NA)    | 145 | 16 (79.3)  | 153 | 8 (NA)     | 108 | 16 (78.7)  |
| Gentamicin                                                         | 144 | 32 (39.6)  | 115 | 32 (34.8)  | 147 | 32 (29.3)  | 112 | 32 (24.1)  | 117 | 32 (33.3)  | 85  | 32 (25.9)  |
| Imipenem <sup>g</sup>                                              | 180 | 16 (1.1)   | 143 | 16 (1.4)   | 214 | 16 (2.8)   | 160 | 16 (1.9)   | 167 | 16 (3.6)   | 119 | 16 (3.4)   |
| Levofloxacin                                                       | 207 | 16 (7.7)   | 168 | 16 (10.1)  | 241 | 16 (10.8)  | 181 | 16 (14.9)  | 187 | 16 (18.7)  | 136 | 16 (27.9)  |
| Meropenem                                                          | 207 | 32 (0)     | 168 | 32 (0)     | 241 | 32 (0)     | 181 | 32 (0)     | 187 | 32 (0)     | 136 | 32 (0)     |
| Piperacillin/tazobactam                                            | 207 | 256 (0.5)  | 168 | 256 (0.6)  | 241 | 256 (0.4)  | 181 | 256 (0.6)  | 187 | 256 (1.6)  | 136 | 256 (0.7)  |
| Tigecycline <sup>h,i,j</sup>                                       | 202 | 2 (92.6)   | 165 | 2 (75.0)   | 223 | 2 (98.2)   | 169 | 2 (75.0)   | 177 | 2 (97.7)   | 129 | 2 (90.0)   |
| <b>North America</b><br><b>(CLSI/EUCAST,</b><br><b>N=174/92)</b>   |     |            |     |            |     |            |     |            |     |            |     |            |
| Aztreonam-avibactam <sup>c</sup>                                   | 52  | 1 (100)    | 30  | 1 (100)    | 31  | 1 (100)    | 16  | 1 (100)    | 30  | 4 (96.7)   | 10  | 4 (100)    |
| Aztreonam                                                          | 52  | 256 (11.5) | 30  | 256 (10.0) | 31  | 256 (25.8) | 16  | 256 (31.3) | 30  | 256 (20.0) | 10  | 256 (20.0) |
| Amikacin                                                           | 57  | 64 (77.2)  | 33  | 128 (57.6) | 33  | 64 (69.7)  | 18  | 64 (61.1)  | 33  | 16 (90.9)  | 12  | 16 (75.0)  |
| Cefepime                                                           | 57  | 64 (14.0)  | 33  | 64 (12.1)  | 33  | 64 (9.1)   | 18  | 64 (11.1)  | 33  | 64 (3.0)   | 12  | 64 (0)     |
| Ceftazidime                                                        | 57  | 256 (14.0) | 33  | 256 (15.2) | 33  | 256 (15.2) | 18  | 256 (22.2) | 33  | 256 (15.2) | 12  | 256 (16.7) |

|                              |    |            |    |            |    |            |    |            |    |            |    |            |
|------------------------------|----|------------|----|------------|----|------------|----|------------|----|------------|----|------------|
| Ceftazidime-avibactam        | 52 | 128 (86.5) | 30 | 128 (83.3) | 31 | 256 (80.7) | 16 | 256 (75.0) | 30 | 256 (76.7) | 10 | 256 (80.0) |
| Ceftriaxone                  | 10 | 64 (10.0)  | 7  | 64 (14.3)  | 4  | 64 (50.0)  | 2  | 64 (50.0)  | 5  | 64 (0)     | 2  | 64 (0)     |
| Ciprofloxacin                | 47 | 8 (12.8)   | 26 | 8 (7.7)    | 29 | 8 (0)      | 16 | 8 (6.3)    | 28 | 8 (21.4)   | 10 | 8 (30.0)   |
| Colistin <sup>e,f</sup>      | 46 | 8 (NA)     | 24 | 8 (87.5)   | 27 | 2 (NA)     | 15 | 2 (93.3)   | 28 | 1 (NA)     | 8  | 1 (100)    |
| Gentamicin                   | 47 | 32 (46.8)  | 26 | 32 (34.6)  | 29 | 32 (44.8)  | 16 | 32 (37.5)  | 28 | 32 (64.3)  | 10 | 32 (50.0)  |
| Imipenem <sup>g</sup>        | 52 | 16 (7.7)   | 30 | 16 (10.0)  | 31 | 16 (19.4)  | 16 | 16 (25.0)  | 30 | 16 (6.7)   | 10 | 16 (20.0)  |
| Levofloxacin                 | 57 | 16 (15.8)  | 33 | 16 (15.2)  | 33 | 16 (6.1)   | 18 | 16 (11.1)  | 33 | 16 (21.2)  | 12 | 16 (25.0)  |
| Meropenem                    | 57 | 32 (0)     | 33 | 32 (0)     | 33 | 32 (0)     | 18 | 32 (0)     | 33 | 32 (0)     | 12 | 32 (0)     |
| Piperacillin/tazobactam      | 57 | 256 (7.0)  | 33 | 256 (12.1) | 33 | 128 (12.1) | 18 | 128 (11.1) | 33 | 128 (0)    | 12 | 128 (0)    |
| Tigecycline <sup>h,i,j</sup> | 57 | 2 (94.7)   | 33 | 2 (100)    | 31 | 2 (90.3)   | 18 | 4 (NA)     | 33 | 4 (84.9)   | 12 | 2 (0)      |

<sup>a</sup> Not all drugs in the panel were tested every year. <sup>b</sup> Data includes percentage isolates susceptible at increased exposure. <sup>c</sup> No breakpoints available from CLSI and EUCAST. Values expressed are indicative of the cumulative percentage of isolates inhibited at  $\leq 8$  mg/L for comparison purposes. <sup>d</sup> The MIC<sub>90</sub> has been presented as NA considering the  $n < 10$ . <sup>e</sup> Susceptible category for colistin not available for CLSI breakpoints (only intermediate and resistant isolates are available). <sup>f</sup> Data for colistin do not include isolates of *Morganella morganii*, *Proteus hauseri*, *Proteus mirabilis*, *Proteus vulgaris*, *Providencia alcalifaciens*, *Providencia rettgeri*, *Providencia spp*, *Providencia stuartii*, and *Serratia marcescens* because of their intrinsic resistance. <sup>g</sup> Data for imipenem not available per EUCAST. <sup>h</sup> Data for tigecycline do not include isolates of *Morganella morganii*, *Proteus hauseri*, *Proteus mirabilis*, *Proteus vulgaris*, *Providencia alcalifaciens*, *Providencia rettgeri*, *Providencia spp*, and *Providencia stuartii* due to their intrinsic resistance. <sup>i</sup> Data for tigecycline was calculated based on FDA approved breakpoints for CLSI. <sup>j</sup> EUCAST data for susceptibility to tigecycline are limited to *E. coli* and *C. Koseri*; denominator (n): AfME: RTI= NA, UTI= 6, SSTI= 4; APAC: RTI= 43, UTI= 82, SSTI= 26; Europe: RTI= 7, UTI= 10, SSTI= 8; LATAM: RTI= 4, UTI= 4, SSTI= 10; North America: RTI= 1, UTI= NA, SSTI= 1. MIC, minimum inhibitory concentration; N, total number of isolates; n, number of isolates from infection sources; NA, not available; RTI, respiratory tract infection; SSTI, skin and soft tissue infection; UTI, urinary tract infection.

Table S8. Cont.

|                                                            | BSI            |                                             |                |                                                    | IAI            |                                             |                |                                                    |
|------------------------------------------------------------|----------------|---------------------------------------------|----------------|----------------------------------------------------|----------------|---------------------------------------------|----------------|----------------------------------------------------|
|                                                            | CLSI           |                                             | EUCAST         |                                                    | CLSI           |                                             | EUCAST         |                                                    |
|                                                            | n <sup>a</sup> | MIC <sub>90</sub><br>( $\mu$ g/mL)<br>(% S) | n <sup>a</sup> | MIC <sub>90</sub><br>(mg/L)<br>(% S <sup>b</sup> ) | n <sup>a</sup> | MIC <sub>90</sub><br>( $\mu$ g/mL)<br>(% S) | n <sup>a</sup> | MIC <sub>90</sub><br>(mg/L)<br>(% S <sup>b</sup> ) |
| <b>Africa-Middle East<br/>(CLSI/EUCAST,<br/>N=337/252)</b> |                |                                             |                |                                                    |                |                                             |                |                                                    |
| Aztreonam-avibactam <sup>c</sup>                           | 83             | 0.25 (100)                                  | 68             | 0.25 (100)                                         | 39             | 2 (100)                                     | 28             | 2 (100)                                            |
| Aztreonam                                                  | 83             | 256 (8.4)                                   | 68             | 256 (4.4)                                          | 39             | 256 (18.0)                                  | 28             | 256 (14.3)                                         |
| Amikacin                                                   | 88             | 128 (58.0)                                  | 73             | 128 (37.0)                                         | 41             | 128 (63.4)                                  | 30             | 128 (43.3)                                         |
| Cefepime                                                   | 88             | 64 (2.3)                                    | 73             | 64 (2.7)                                           | 41             | 64 (9.8)                                    | 30             | 64 (6.7)                                           |
| Ceftazidime                                                | 88             | 256 (1.1)                                   | 73             | 256 (1.4)                                          | 41             | 256 (7.3)                                   | 30             | 256 (10.0)                                         |
| Ceftazidime-avibactam                                      | 83             | 256 (32.5)                                  | 68             | 256 (32.4)                                         | 39             | 256 (66.7)                                  | 28             | 256 (67.9)                                         |
| Ceftriaxone                                                | 15             | 64 (0)                                      | 14             | 64 (0)                                             | 10             | 64 (0)                                      | 9              | NA <sup>d</sup> (11.1)                             |
| Ciprofloxacin                                              | 73             | 8 (9.6)                                     | 59             | 8 (15.3)                                           | 31             | 8 (3.2)                                     | 21             | 8 (9.5)                                            |
| Colistin <sup>e,f</sup>                                    | 78             | 1 (NA)                                      | 66             | 1 (97.0)                                           | 34             | 1 (NA)                                      | 26             | 1 (100)                                            |
| Gentamicin                                                 | 73             | 32 (27.4)                                   | 59             | 32 (25.4)                                          | 31             | 32 (41.9)                                   | 21             | 32 (42.9)                                          |
| Imipenem <sup>g</sup>                                      | 83             | 16 (1.2)                                    | 68             | 16 (7.4)                                           | 39             | 16 (0)                                      | 28             | 16 (7.1)                                           |
| Levofloxacin                                               | 88             | 16 (19.3)                                   | 73             | 16 (23.3)                                          | 41             | 16 (2.4)                                    | 30             | 16 (6.7)                                           |
| Meropenem                                                  | 88             | 32 (0)                                      | 73             | 32 (0)                                             | 41             | 32 (0)                                      | 30             | 32 (0)                                             |
| Piperacillin/tazobactam                                    | 88             | 256 (1.1)                                   | 73             | 256 (1.4)                                          | 41             | 256 (0)                                     | 30             | 256 (0)                                            |

|                                                                    |     |            |     |            |     |            |     |            |
|--------------------------------------------------------------------|-----|------------|-----|------------|-----|------------|-----|------------|
| Tigecycline <sup>h,i,j</sup>                                       | 86  | 2 (96.5)   | 71  | 2 (100)    | 37  | 2 (91.9)   | 29  | 4 (100)    |
| <b>Asia-Pacific</b><br><b>(CLSI/EUCAST,</b><br><b>N=1691/1531)</b> |     |            |     |            |     |            |     |            |
| Aztreonam-avibactam <sup>c</sup>                                   | 263 | 2 (98.5)   | 250 | 2 (99.2)   | 121 | 2 (99.2)   | 109 | 2 (99.1)   |
| Aztreonam                                                          | 344 | 256 (8.1)  | 327 | 256 (7.7)  | 163 | 256 (10.4) | 147 | 256 (10.2) |
| Amikacin                                                           | 365 | 128 (37.3) | 346 | 128 (31.2) | 172 | 128 (44.8) | 153 | 128 (36.6) |
| Cefepime                                                           | 365 | 64 (0)     | 346 | 64 (0)     | 172 | 64 (0.6)   | 153 | 64 (0.7)   |
| Ceftazidime                                                        | 365 | 256 (1.6)  | 346 | 256 (1.7)  | 172 | 256 (1.7)  | 153 | 256 (2.0)  |
| Ceftazidime-avibactam                                              | 344 | 256 (39.0) | 327 | 256 (38.8) | 163 | 256 (49.1) | 147 | 256 (48.3) |
| Ceftriaxone                                                        | 35  | 64 (0)     | 33  | 64 (0)     | 36  | 64 (0)     | 29  | 64 (0)     |
| Ciprofloxacin                                                      | 330 | 8 (4.2)    | 313 | 8 (5.4)    | 136 | 8 (2.2)    | 124 | 8 (4.8)    |
| Colistin <sup>e,f</sup>                                            | 320 | 4 (NA)     | 305 | 4 (89.5)   | 151 | 4 (NA)     | 139 | 8 (87.8)   |
| Gentamicin                                                         | 330 | 32 (26.1)  | 313 | 32 (23.3)  | 136 | 32 (25.7)  | 124 | 32 (25.8)  |
| Imipenem <sup>g</sup>                                              | 344 | 16 (1.7)   | 327 | 16 (4.6)   | 163 | 16 (5.5)   | 147 | 16 (6.1)   |
| Levofloxacin                                                       | 365 | 16 (6.6)   | 346 | 16 (9.3)   | 172 | 16 (5.8)   | 153 | 16 (7.2)   |
| Meropenem                                                          | 365 | 32 (0)     | 346 | 32 (0)     | 172 | 32 (0)     | 153 | 32 (0)     |
| Piperacillin/tazobactam                                            | 365 | 128 (0.3)  | 346 | 128 (0)    | 172 | 256 (1.7)  | 153 | 256 (2.0)  |
| Tigecycline <sup>h,i,j</sup>                                       | 352 | 2 (95.7)   | 335 | 2 (88.9)   | 165 | 2 (93.3)   | 148 | 2 (84.6)   |
| <b>Europe</b><br><b>(CLSI/EUCAST,</b><br><b>N=2241/1649)</b>       |     |            |     |            |     |            |     |            |
| Aztreonam-avibactam <sup>c</sup>                                   | 426 | 0.5 (99.5) | 333 | 0.5 (99.7) | 235 | 1 (100)    | 181 | 1 (100)    |
| Aztreonam                                                          | 426 | 256 (9.6)  | 333 | 256 (8.7)  | 235 | 256 (3.8)  | 181 | 256 (3.3)  |
| Amikacin                                                           | 533 | 128 (61)   | 417 | 128 (35.7) | 302 | 64 (64.9)  | 231 | 128 (37.2) |
| Cefepime                                                           | 533 | 64 (2.6)   | 417 | 64 (4.1)   | 302 | 64 (2.0)   | 231 | 64 (2.2)   |
| Ceftazidime                                                        | 533 | 256 (3.8)  | 417 | 256 (3.8)  | 302 | 256 (1.0)  | 231 | 256 (0.9)  |
| Ceftazidime-avibactam                                              | 426 | 256 (74.7) | 333 | 256 (76.9) | 235 | 256 (73.6) | 181 | 256 (74.0) |
| Ceftriaxone                                                        | 176 | 64 (0)     | 136 | 64 (0.7)   | 151 | 64 (0)     | 115 | 64 (0)     |
| Ciprofloxacin                                                      | 357 | 8 (3.6)    | 281 | 8 (3.9)    | 151 | 8 (4.0)    | 116 | 8 (1.7)    |
| Colistin <sup>e,f</sup>                                            | 398 | 16 (NA)    | 317 | 16 (76.3)  | 233 | 16 (NA)    | 181 | 16 (78.5)  |
| Gentamicin                                                         | 357 | 32 (34.5)  | 281 | 32 (29.2)  | 151 | 32 (37.8)  | 116 | 32 (32.8)  |
| Imipenem <sup>g</sup>                                              | 426 | 16 (1.9)   | 333 | 16 (6.0)   | 235 | 16 (2.6)   | 181 | 16 (4.4)   |
| Levofloxacin                                                       | 533 | 16 (4.5)   | 417 | 16 (4.6)   | 302 | 16 (5.3)   | 231 | 16 (4.3)   |
| Meropenem                                                          | 533 | 32 (0)     | 417 | 32 (0)     | 302 | 32 (0)     | 231 | 32 (0)     |
| Piperacillin/tazobactam                                            | 533 | 256 (0.8)  | 417 | 256 (0.5)  | 302 | 256 (0.3)  | 231 | 256 (0.4)  |
| Tigecycline <sup>h,i,j</sup>                                       | 512 | 2 (92.0)   | 407 | 2 (100)    | 300 | 2 (92.7)   | 231 | 2 (85.7)   |
| <b>Latin America</b><br><b>(CLSI/EUCAST,</b><br><b>N=1133/864)</b> |     |            |     |            |     |            |     |            |
| Aztreonam-avibactam <sup>c</sup>                                   | 290 | 0.5 (99.7) | 220 | 0.5 (99.6) | 136 | 0.5 (100)  | 96  | 0.5 (100)  |
| Aztreonam                                                          | 290 | 256 (7.2)  | 220 | 256 (5.9)  | 136 | 256 (5.9)  | 96  | 256 (3.1)  |
| Amikacin                                                           | 321 | 64 (67.9)  | 248 | 128 (49.6) | 164 | 64 (76.2)  | 122 | 64 (53.3)  |
| Cefepime                                                           | 321 | 64 (1.6)   | 248 | 64 (0.8)   | 164 | 64 (1.2)   | 122 | 64 (0.8)   |
| Ceftazidime                                                        | 321 | 256 (6.9)  | 248 | 256 (4.8)  | 164 | 256 (4.3)  | 122 | 256 (0.8)  |
| Ceftazidime-avibactam                                              | 290 | 256 (71.7) | 220 | 256 (71.4) | 136 | 256 (72.1) | 96  | 256 (70.8) |
| Ceftriaxone                                                        | 90  | 64 (0)     | 70  | 64 (0)     | 74  | 64 (0)     | 65  | 64 (0)     |
| Ciprofloxacin                                                      | 231 | 8 (15.2)   | 178 | 8 (12.9)   | 90  | 8 (20.0)   | 57  | 8 (14.0)   |
| Colistin <sup>e,f</sup>                                            | 262 | 16 (NA)    | 200 | 16 (78.5)  | 131 | 16 (0)     | 95  | 16 (74.7)  |
| Gentamicin                                                         | 231 | 32 (45.9)  | 178 | 32 (44.9)  | 90  | 32 (48.9)  | 57  | 32 (43.9)  |
| Imipenem <sup>g</sup>                                              | 290 | 16 (1.4)   | 220 | 16 (4.1)   | 136 | 16 (1.5)   | 96  | 16 (1.0)   |

|                                                      |     |                     |     |                     |     |            |     |                        |
|------------------------------------------------------|-----|---------------------|-----|---------------------|-----|------------|-----|------------------------|
| Levofloxacin                                         | 321 | 16 (19.6)           | 248 | 16 (21.8)           | 164 | 16 (17.1)  | 122 | 16 (19.7)              |
| Meropenem                                            | 321 | 32 (0)              | 248 | 32 (0)              | 164 | 32 (0)     | 122 | 32 (0)                 |
| Piperacillin/tazobactam                              | 321 | 256 (0.3)           | 248 | 256 (0.4)           | 164 | 256 (1.2)  | 122 | 256 (0)                |
| Tigecycline <sup>h,i,j</sup>                         | 313 | 2 (94.9)            | 244 | 2 (88.9)            | 160 | 2 (95.0)   | 122 | 2 (87.5)               |
| <b>North America<br/>(CLSI/EUCAST,<br/>N=174/92)</b> |     |                     |     |                     |     |            |     |                        |
| Aztreonam-avibactam <sup>c</sup>                     | 18  | 2 (94.5)            | 11  | 0.5 (90.9)          | 18  | 4 (100)    | 11  | 2 (100)                |
| Aztreonam                                            | 18  | 256 (0)             | 11  | 256 (0)             | 18  | 256 (0)    | 11  | 256 (0)                |
| Amikacin                                             | 21  | 32 (81.0)           | 12  | 64 (66.7)           | 27  | 128 (81.5) | 15  | 128 (66.7)             |
| Cefepime                                             | 21  | 64 (14.3)           | 12  | 64 (8.3)            | 27  | 64 (3.7)   | 15  | 64 (0)                 |
| Ceftazidime                                          | 21  | 256 (4.8)           | 12  | 256 (0)             | 27  | 256 (0)    | 15  | 256 (0)                |
| Ceftazidime-avibactam                                | 18  | 4 (94.4)            | 11  | 4 (90.9)            | 18  | 256 (83.3) | 11  | 256 (81.8)             |
| Ceftriaxone                                          | 4   | NA <sup>d</sup> (0) | 1   | NA <sup>d</sup> (0) | 15  | 64 (0)     | 9   | NA <sup>d</sup> (0)    |
| Ciprofloxacin                                        | 17  | 8 (23.5)            | 11  | 8 (18.2)            | 12  | 8 (25.0)   | 6   | NA <sup>d</sup> (16.7) |
| Colistin <sup>e,f</sup>                              | 18  | 2 (NA)              | 11  | 0.5 (90.9)          | 17  | 1 (NA)     | 10  | 8 (90)                 |
| Gentamicin                                           | 17  | 32 (47.1)           | 11  | 32 (45.5)           | 12  | 32 (41.7)  | 6   | NA <sup>d</sup> (33.3) |
| Imipenem <sup>g</sup>                                | 18  | 16 (5.6)            | 11  | 16 (9.1)            | 18  | 16 (0)     | 11  | 16 (0)                 |
| Levofloxacin                                         | 21  | 16 (28.6)           | 12  | 16 (16.7)           | 27  | 16 (22.2)  | 15  | 16 (6.7)               |
| Meropenem                                            | 21  | 32 (0)              | 12  | 32 (0)              | 27  | 32 (0)     | 15  | 32 (0)                 |
| Piperacillin/tazobactam                              | 21  | 128 (0)             | 12  | 128 (0)             | 27  | 256 (0)    | 15  | 256 (0)                |
| Tigecycline <sup>h,i,j</sup>                         | 21  | 2 (95.2)            | 12  | 2 (NA)              | 27  | 4 (88.9)   | 15  | 1 (0)                  |

<sup>a</sup>Not all drugs in the panel were tested every year. <sup>b</sup>Data includes percentage isolates susceptible at increased exposure. <sup>c</sup>No breakpoints available from CLSI and EUCAST. Values expressed are indicative of the cumulative percentage of isolates inhibited at  $\leq 8$  mg/L for comparison purposes. <sup>d</sup>The MIC<sub>90</sub> has been presented as NA considering the  $n < 10$ . <sup>e</sup>Susceptible category for colistin not available for CLSI breakpoints (only intermediate and resistant isolates are available). <sup>f</sup>Data for colistin do not include isolates of *Morganella morganii*, *Proteus hauseri*, *Proteus mirabilis*, *Proteus vulgaris*, *Providencia alcalifaciens*, *Providencia rettgeri*, *Providencia spp*, *Providencia stuartii*, and *Serratia marcescens* because of their intrinsic resistance. <sup>g</sup>Data for imipenem not available per EUCAST. <sup>h</sup>Data for tigecycline do not include isolates of *Morganella morganii*, *Proteus hauseri*, *Proteus mirabilis*, *Proteus vulgaris*, *Providencia alcalifaciens*, *Providencia rettgeri*, *Providencia spp*, and *Providencia stuartii* due to their intrinsic resistance. <sup>i</sup>Data for tigecycline was calculated based on FDA approved breakpoints for CLSI. <sup>j</sup>EUCAST data for susceptibility to tigecycline are limited to *E. coli* and *C. Koseri*; denominator (n): AfME: BSI= 1, IAI= 1; APAC: BSI= 54, IAI=26; Europe: BSI= 2, IAI= 7; LATAM: BSI= 9, IAI=8; North America: BSI= NA, IAI=1. BSI, bloodstream infections; IAI, intra-abdominal infection; MIC, minimum inhibitory concentration; N, total number of isolates; n, number of isolates from infection sources; NA, not available.

**Table S9.** *In vitro* activity of ATM-AVI and comparator agents tested against MBL-positive Enterobacterales isolates across regions stratified by wards from 2016–2020.

| Africa-Middle East<br>(N= 190)   | n <sup>b</sup> | ICU                                                                  |  | Non-ICU                                                              |  |
|----------------------------------|----------------|----------------------------------------------------------------------|--|----------------------------------------------------------------------|--|
|                                  |                | MIC <sub>90</sub> (μg/mL)<br>(% S, CLSI/%S,<br>EUCAST <sup>a</sup> ) |  | MIC <sub>90</sub> (μg/mL)<br>(% S, CLSI/%S,<br>EUCAST <sup>a</sup> ) |  |
| Aztreonam-avibactam <sup>c</sup> | 58             | 0.5 (100)                                                            |  | 0.25 (100)                                                           |  |
| Aztreonam                        | 58             | 256 (22.4/22.4)                                                      |  | 128 (21.2/21.2)                                                      |  |
| Amikacin                         | 58             | 128 (56.9/43.1)                                                      |  | 128 (60.6/42.3)                                                      |  |
| Cefepime                         | 58             | 64 (3.5/3.5)                                                         |  | 64 (2.9/5.8)                                                         |  |
| Ceftazidime                      | 58             | 256 (1.7/1.7)                                                        |  | 256 (0/0)                                                            |  |
| Ceftazidime-avibactam            | 58             | 256 (3.5/3.5)                                                        |  | 256 (1.9/1.9)                                                        |  |
| Ceftriaxone                      | 4              | NA <sup>d</sup> (0/0)                                                |  | 32 (0/0)                                                             |  |
| Ciprofloxacin                    | 54             | 8 (16.7/16.7)                                                        |  | 8 (6.7/15.6)                                                         |  |

|                                  |     |                 |     |                 |
|----------------------------------|-----|-----------------|-----|-----------------|
| Colistin <sup>e,f</sup>          | 49  | 1 (NA/95.9)     | 88  | 1 (NA/96.6)     |
| Gentamicin                       | 54  | 32 (33.3/31.5)  | 90  | 32 (36.7/35.6)  |
| Imipenem <sup>g</sup>            | 58  | 16 (1.7/10.3)   | 104 | 16 (1/NA)       |
| Levofloxacin                     | 58  | 16 (24.1/34.5)  | 104 | 16 (17.3/22.1)  |
| Meropenem                        | 58  | 32 (1.7/29.3)   | 104 | 32 (4.8/35.6)   |
| Piperacillin/tazobactam          | 58  | 128 (1.7/1.7)   | 104 | 128 (1.0/1.0)   |
| Tigecycline <sup>h,i,j</sup>     | 55  | 2 (94.6/100)    | 89  | 2 (96.6/100)    |
| <b>Asia-Pacific</b>              |     |                 |     |                 |
| <b>(N= 735)</b>                  |     |                 |     |                 |
| Aztreonam-avibactam <sup>c</sup> | 285 | 4 (96.8)        | 302 | 4 (99.3)        |
| Aztreonam                        | 317 | 256 (8.8/8.8)   | 324 | 256 (14.5/14.5) |
| Amikacin                         | 317 | 128 (27.8/20.8) | 325 | 128 (51.7/43.7) |
| Cefepime                         | 317 | 64 (0/0.6)      | 325 | 64 (0.3/1.2)    |
| Ceftazidime                      | 317 | 256 (0/0)       | 325 | 256 (0/0)       |
| Ceftazidime-avibactam            | 317 | 256 (0.6/0.6)   | 324 | 256 (0.3/0.3)   |
| Ceftriaxone                      | 23  | 32 (0/0)        | 63  | 32 (0/0)        |
| Ciprofloxacin                    | 294 | 8 (3.7/5.4)     | 262 | 8 (3.1/6.1)     |
| Colistin <sup>e,f</sup>          | 282 | 2 (NA/90.8)     | 305 | 1 (NA/93.4)     |
| Gentamicin                       | 294 | 32 (19.7/19.1)  | 262 | 32 (32.8/31.3)  |
| Imipenem <sup>g</sup>            | 317 | 16 (1.6/NA)     | 324 | 16 (1.5/7.7)    |
| Levofloxacin                     | 317 | 16 (6.0/10.4)   | 325 | 16 (5.9/10.8)   |
| Meropenem                        | 317 | 32 (2.2/10.1)   | 325 | 32 (1.2/12.0)   |
| Piperacillin/tazobactam          | 317 | 128 (1.9/1.9)   | 325 | 256 (2.2/2.2)   |
| Tigecycline <sup>h,i,j</sup>     | 289 | 2 (94.8/92.5)   | 311 | 2 (92.9/92.0)   |
| <b>Europe</b>                    |     |                 |     |                 |
| <b>(N= 604)</b>                  |     |                 |     |                 |
| Aztreonam-avibactam <sup>c</sup> | 235 | 0.5 (100)       | 310 | 0.5 (99.7)      |
| Aztreonam                        | 235 | 256 (17.9/17.9) | 310 | 256 (20.3/20.3) |
| Amikacin                         | 235 | 128 (46.8/33.2) | 311 | 128 (53.7/41.2) |
| Cefepime                         | 235 | 64 (0.4/0.4)    | 311 | 64 (2.9/4.5)    |
| Ceftazidime                      | 235 | 256 (0/0)       | 311 | 256 (0/0)       |
| Ceftazidime-avibactam            | 235 | 256 (4.3/4.3)   | 310 | 256 (6.5/6.5)   |
| Ceftriaxone                      | 43  | 32 (0/0)        | 93  | 32 (0/0)        |
| Ciprofloxacin                    | 192 | 8 (6.8/10.4)    | 218 | 8 (6.4/11.9)    |
| Colistin <sup>e,f</sup>          | 201 | 4 (NA/88.6)     | 266 | 8 (NA/88.4)     |
| Gentamicin                       | 192 | 32 (28.7/25.5)  | 218 | 32 (34.9/32.6)  |
| Imipenem <sup>g</sup>            | 235 | 16 (1.7/11.9)   | 310 | 16 (1.3/NA)     |
| Levofloxacin                     | 235 | 16 (11.9/13.6)  | 311 | 16 (10.3/17.0)  |
| Meropenem                        | 235 | 32 (4.7/26.4)   | 311 | 32 (8.7/37.3)   |
| Piperacillin/tazobactam          | 235 | 256 (0.4/0.4)   | 311 | 256 (0.3/0.3)   |
| Tigecycline <sup>h,i,j</sup>     | 210 | 2 (94.8/83.3)   | 271 | 2 (91.1/94.4)   |
| <b>Latin America</b>             |     |                 |     |                 |
| <b>(N= 326)</b>                  |     |                 |     |                 |
| Aztreonam-avibactam <sup>c</sup> | 110 | 0.25 (100)      | 148 | 0.5 (100)       |
| Aztreonam                        | 110 | 256 (23.6/23.6) | 148 | 128 (27.0/27.0) |
| Amikacin                         | 113 | 128 (40.7/33.6) | 155 | 128 (61.9/51.0) |
| Cefepime                         | 113 | 64 (0/0)        | 155 | 64 (0/3.9)      |
| Ceftazidime                      | 113 | 256 (0/0)       | 155 | 256 (0/0)       |
| Ceftazidime-avibactam            | 110 | 256 (0.9/0.9)   | 148 | 256 (0.7/0.7)   |
| Ceftriaxone                      | 19  | 64 (0/0)        | 24  | 64 (0/0)        |
| Ciprofloxacin                    | 94  | 8 (14.9/16.0)   | 131 | 8 (10.7/13.0)   |

|                                  |     |                             |     |                       |
|----------------------------------|-----|-----------------------------|-----|-----------------------|
| Colistin <sup>e,f</sup>          | 94  | 2 (NA/90.4)                 | 130 | 1 (NA/91.5)           |
| Gentamicin                       | 94  | 32 (17.0/14.9)              | 131 | 32 (31.3/30.5)        |
| Imipenem <sup>g</sup>            | 110 | 16 (0/NA)                   | 148 | 16 (0.7/NA)           |
| Levofloxacin                     | 113 | 16 (26.6/42.5)              | 155 | 16 (20.0/35.5)        |
| Meropenem                        | 113 | 32 (3.5/31.0)               | 155 | 32 (3.2/26.5)         |
| Piperacillin/tazobactam          | 113 | 256 (0.9/0.9)               | 155 | 256 (0.7/0.7)         |
| Tigecycline <sup>h,i,j</sup>     | 98  | 2 (94.9/90.9)               | 139 | 2 (94.2/93.3)         |
| <b>North America<br/>(N=22)</b>  |     |                             |     |                       |
| Aztreonam-avibactam <sup>c</sup> | 5   | NA <sup>d</sup> (100)       | 14  | 0.5 (100)             |
| Aztreonam                        | 5   | NA <sup>d</sup> (40.0/40.0) | 14  | 128 (14.3/14.3)       |
| Amikacin                         | 5   | NA <sup>d</sup> (80.0/60.0) | 14  | 128 (50.0/50.0)       |
| Cefepime                         | 5   | NA <sup>d</sup> (0/0)       | 14  | 64 (0/0)              |
| Ceftazidime                      | 5   | NA <sup>d</sup> (0/0)       | 14  | 256 (0/0)             |
| Ceftazidime-avibactam            | 5   | NA <sup>d</sup> (0/0)       | 14  | 256 (0/0)             |
| Ceftriaxone                      | NA  | NA                          | 1   | NA <sup>d</sup> (0/0) |
| Ciprofloxacin                    | 5   | NA <sup>d</sup> (40.0/60.0) | 13  | 8 (7.7/15.4)          |
| Colistin <sup>e,f</sup>          | 5   | NA <sup>d</sup> (NA/80.0)   | 13  | 0.5 (NA/92.3)         |
| Gentamicin                       | 5   | NA <sup>d</sup> (60.0/60.0) | 13  | 32 (0/0)              |
| Imipenem <sup>g</sup>            | 5   | NA <sup>d</sup> (0/20.0)    | 14  | 16 (0/7.1)            |
| Levofloxacin                     | 5   | NA <sup>d</sup> (60.0/80.0) | 14  | 16 (14.3/14.3)        |
| Meropenem                        | 5   | NA <sup>d</sup> (0/60.0)    | 14  | 32 (0/35.7)           |
| Piperacillin/tazobactam          | 5   | NA <sup>d</sup> (0/0)       | 14  | 128 (0/0)             |
| Tigecycline <sup>h,i,j</sup>     | 5   | NA <sup>d</sup> (100/NA)    | 14  | 1 (92.9/0)            |

<sup>a</sup> Data includes percentage isolates susceptible at increased exposure. <sup>b</sup> Not all drugs in the panel were tested every year. <sup>c</sup> No breakpoints available from CLSI and EUCAST. Values expressed are indicative of the cumulative percentage of isolates inhibited at ≤8 mg/L for comparison purposes. <sup>d</sup> The MIC<sub>90</sub> has been presented as NA considering the n<10. <sup>e</sup> Susceptible category for colistin not available for CLSI breakpoints (only intermediate and resistant isolates are available). <sup>f</sup> Data for colistin do not include isolates of *Morganella morganii*, *Proteus hauseri*, *Proteus mirabilis*, *Proteus vulgaris*, *Providencia alcalifaciens*, *Providencia rettgeri*, *Providencia spp*, *Providencia stuartii*, and *Serratia marcescens*. <sup>g</sup> Data for imipenem not available per EUCAST. <sup>h</sup> Data for tigecycline do not include isolates of *Morganella morganii*, *Proteus hauseri*, *Proteus mirabilis*, *Proteus vulgaris*, *Providencia alcalifaciens*, *Providencia rettgeri*, *Providencia spp*, and *Providencia stuartii*. <sup>i</sup> Data for tigecycline was calculated based on FDA approved breakpoints for CLSI. <sup>j</sup> EUCAST data for susceptibility to tigecycline are limited to *E. coli* and *C. koseri*; denominator (n): AfME: ICU=3, non-ICU=9; APAC: ICU=67, non-ICU=75; Europe: ICU=6, non-ICU=18; LATAM: ICU=11, non-ICU=15; North America: ICU=NA, non-ICU=1. ICU, intensive care unit; MIC, minimum inhibitory concentration; N, total number of isolates; n, number of isolates from wards; NA, not available.

**Table S10.** *In vitro* activity of ATM-AVI and comparator agents tested against MBL-positive Enterobacterales isolates across regions stratified by infection sources from 2016–2020.

| MIC <sub>90</sub> (μg/mL) (% S, CLSI/%S, EUCAST <sup>a</sup> ) |    |                 |    |                 |    |                 |    |                 |    |                 |  |
|----------------------------------------------------------------|----|-----------------|----|-----------------|----|-----------------|----|-----------------|----|-----------------|--|
| RTI                                                            |    | UTI             |    | SSTI            |    | BSI             |    | IAI             |    |                 |  |
| Africa-Middle East<br>(N= 190)                                 |    | n <sup>b</sup>  |  |
| Aztreonam-avibactam <sup>c</sup>                               | 24 | 0.25 (100)      | 59 | 1 (100)         | 38 | 0.5 (100)       | 54 | 0.25 (100)      | 15 | 0.25 (100)      |  |
| Aztreonam                                                      | 24 | 256 (20.8/20.8) | 59 | 256 (28.8/28.8) | 38 | 256 (13.2/13.2) | 54 | 128 (11.1/11.1) | 15 | 128 (40.0/40.0) |  |
| Amikacin                                                       | 24 | 128 (54.2/33.3) | 59 | 128 (71.2/55.9) | 38 | 128 (57.9/42.1) | 54 | 128 (50.0/37.0) | 15 | 128 (66.7/53.3) |  |

|                                   |     |                       |     |                       |     |                       |     |                       |    |                       |
|-----------------------------------|-----|-----------------------|-----|-----------------------|-----|-----------------------|-----|-----------------------|----|-----------------------|
| Cefepime                          | 24  | 64 (0/0)              | 59  | 64 (3.4/8.5)          | 38  | 64 (0/0)              | 54  | 64 (0/1.9)            | 15 | 64 (20.0/20.0)        |
| Ceftazidime                       | 24  | 256 (0/0)             | 59  | 256 (0/0)             | 38  | 256 (0/0)             | 54  | 256 (0/0)             | 15 | 256 (6.7/6.7)         |
| Ceftazidime-avibac-tam            | 24  | 256 (8.3/8.3)         | 59  | 256 (0/0)             | 38  | 256 (2.6/2.6)         | 54  | 256 (0/0)             | 15 | 256 (6.7/6.7)         |
| Ceftriaxone                       | 3   | NA <sup>d</sup> (0/0) | 4   | NA <sup>d</sup> (0/0) | 6   | NA <sup>d</sup> (0/0) | 6   | NA <sup>d</sup> (0/0) | 4  | NA <sup>d</sup> (0/0) |
| Ciprofloxacin                     | 21  | 8 (14.3/14.3)         | 55  | 8 (5.5/12.7)          | 32  | 8 (3.1/9.4)           | 48  | 8 (12.5/16.7)         | 11 | 8 (18.2/27.3)         |
| Colistin <sup>e,f</sup>           | 22  | 1 (NA/90.9)           | 44  | 4 (NA/88.6)           | 34  | 1 (NA/100)            | 49  | 1 (NA/98.0)           | 12 | 1 (NA/100)            |
| Gentamicin                        | 21  | 32 (47.6/47.6)        | 55  | 32 (27.3/27.3)        | 32  | 32 (34.4/34.4)        | 48  | 32 (27.1/22.9)        | 11 | 32 (45.5/45.5)        |
| Imipenem <sup>g</sup>             | 24  | 16 (4.2/8.3)          | 59  | 16 (1.7/6.8)          | 38  | 16 (0/NA)             | 54  | 16 (0/7.4)            | 15 | 16 (0/26.7)           |
| Levofloxacin                      | 24  | 16 (16.7/20.8)        | 59  | 16 (18.6/27.1)        | 38  | 16 (10.5/18.4)        | 54  | 16 (25.9/38.9)        | 15 | 16 (26.7/26.7)        |
| Meropenem                         | 24  | 32 (4.2/16.7)         | 59  | 32 (3.4/32.2)         | 38  | 32 (2.6/39.5)         | 54  | 32 (3.7/20.4)         | 15 | 32 (6.7/46.7)         |
| Piperacillin/tazobac-tam          | 24  | 256 (4.2/4.2)         | 59  | 128 (1.7/1.7)         | 38  | 256 (0/0)             | 54  | 128 (1.9/1.9)         | 15 | 256 (0/0)             |
| Tigecycline <sup>h,i,j</sup>      | 23  | 2 (95.7/NA)           | 48  | 2 (97.9/100)          | 34  | 2 (94.1/100)          | 52  | 1 (98.1/100)          | 12 | 4 (83.3/100)          |
| <b>Asia-Pacific<br/>(N= 735)</b>  |     |                       |     |                       |     |                       |     |                       |    |                       |
| Aztreonam-avibac-tam <sup>c</sup> | 172 | 2 (98.8)              | 190 | 4 (97.4)              | 100 | 2 (99)                | 148 | 4 (98.7)              | 54 | 2 (98.2)              |
| Aztreonam                         | 185 | 256 (12.4/12.4)       | 205 | 256 (14.2/14.2)       | 109 | 256 (11.0/11.0)       | 176 | 256 (10.8/10.8)       | 56 | 256 (10.7/10.7)       |
| Amikacin                          | 185 | 128 (42.2/34.6)       | 207 | 128 (32.9/27.1)       | 109 | 128 (50.5/41.3)       | 176 | 128 (32.4/24.4)       | 56 | 128 (55.4/48.2)       |
| Cefepime                          | 185 | 64 (0/0.5)            | 207 | 64 (0.5/1.9)          | 109 | 64 (0/0.9)            | 176 | 64 (0/0.6)            | 56 | 64 (0/0)              |
| Ceftazidime                       | 185 | 256 (0/0)             | 207 | 256 (0/0)             | 109 | 256 (0/0)             | 176 | 256 (0/0)             | 56 | 256 (0/0)             |
| Ceftazidime-avibac-tam            | 185 | 256 (0/0)             | 205 | 256 (1.0/1.0)         | 109 | 256 (0/0)             | 176 | 256 (0.6/0.6)         | 56 | 256 (0/0)             |
| Ceftriaxone                       | 39  | 32 (0/0)              | 28  | 32 (0/0)              | 23  | 32 (0/0)              | 5   | 32 (0/0)              | 7  | 32 (0/0)              |
| Ciprofloxacin                     | 146 | 8 (2.1/4.8)           | 179 | 8 (1.7/2.8)           | 86  | 8 (4.7/5.8)           | 171 | 8 (5.9/8.8)           | 49 | 8 (2.0/6.1)           |
| Colistin <sup>e,f</sup>           | 174 | 4 (NA/89.7)           | 182 | 1 (NA/94.5)           | 99  | 1 (NA/93.9)           | 159 | 1 (NA/93.7)           | 55 | 1 (NA/90.9)           |
| Gentamicin                        | 146 | 32 (26.0/26.0)        | 179 | 32 (16.8/16.2)        | 86  | 32 (29.1/29.1)        | 171 | 32 (26.3/24.0)        | 49 | 32 (34.7/32.7)        |
| Imipenem <sup>g</sup>             | 185 | 16 (1.6/8.1)          | 205 | 16 (1.0/6.3)          | 109 | 16 (1.8/NA)           | 176 | 16 (0.6/NA)           | 56 | 16 (5.4/8.9)          |
| Levofloxacin                      | 185 | 16 (5.4/11.4)         | 207 | 16 (3.4/6.3)          | 109 | 16 (8.3/12.8)         | 176 | 16 (10.2/15.3)        | 56 | 16 (3.6/8.9)          |
| Meropenem                         | 185 | 32 (2.7/15.7)         | 207 | 32 (1.9/10.6)         | 109 | 32 (1.8/14.7)         | 176 | 32 (0.6/5.7)          | 56 | 32 (1.8/12.5)         |
| Piperacillin/tazobac-tam          | 185 | 256 (3.2/3.2)         | 207 | 256 (1.5/1.5)         | 109 | 256 (2.8/2.8)         | 176 | 128 (0.6/0.6)         | 56 | 128 (1.8/1.8)         |
| Tigecycline <sup>h,i,j</sup>      | 178 | 2 (92.7/93.1)         | 186 | 2 (94.6/90.9)         | 100 | 4 (90.0/100)          | 164 | 2 (97.6/94.3)         | 56 | 2 (92.9/81.8)         |
| <b>Europe<br/>(N= 604)</b>        |     |                       |     |                       |     |                       |     |                       |    |                       |
| Aztreonam-avibac-tam <sup>c</sup> | 179 | 0.5 (100)             | 138 | 0.5 (99.3)            | 96  | 0.5 (100)             | 111 | 0.5 (100)             | 78 | 1 (100)               |
| Aztreonam                         | 179 | 256 (15.6/15.6)       | 138 | 256 (27.5/27.5)       | 96  | 256 (27.1/27.1)       | 111 | 256 (20.7/20.7)       | 78 | 256 (12.8/12.8)       |
| Amikacin                          | 179 | 128 (46.4/35.2)       | 139 | 128 (47.5/39.6)       | 97  | 128 (54.6/35.1)       | 111 | 128 (55.9/41.4)       | 78 | 128 (61.5/48.7)       |
| Cefepime                          | 179 | 64 (0/0.6)            | 139 | 64 (2.2/3.6)          | 97  | 64 (3.1/5.2)          | 111 | 64 (0/0)              | 78 | 64 (5.1/6.4)          |
| Ceftazidime                       | 179 | 256 (0/0)             | 139 | 256 (0/0)             | 97  | 256 (0/0)             | 111 | 256 (0/0)             | 78 | 256 (0/0)             |
| Ceftazidime-avibac-tam            | 179 | 256 (3.9/3.9)         | 138 | 256 (2.9/2.9)         | 96  | 256 (14.6/14.6)       | 111 | 256 (3.6/3.6)         | 78 | 256 (3.9/3.9)         |
| Ceftriaxone                       | 34  | 32 (0/0)              | 33  | 32 (0/0)              | 37  | 32 (0/0)              | 17  | 32 (0/0)              | 33 | 32 (0/0)              |
| Ciprofloxacin                     | 145 | 8 (6.2/9.0)           | 106 | 8 (8.5/13.2)          | 60  | 8 (3.3/6.7)           | 94  | 8 (6.4/13.8)          | 45 | 8 (4.4/6.7)           |
| Colistin <sup>e,f</sup>           | 160 | 4 (NA/89.4)           | 115 | 16 (NA/82.6)          | 79  | 1 (NA/93.7)           | 88  | 4 (NA/87.5)           | 75 | 16 (NA/86.7)          |



|                                  |     |                             |     |                             |    |                             |     |                 |    |                          |
|----------------------------------|-----|-----------------------------|-----|-----------------------------|----|-----------------------------|-----|-----------------|----|--------------------------|
| Gentamicin                       | 145 | 32 (29.7/27.6)              | 106 | 32 (34.0/30.2)              | 60 | 32 (38.3/35.0)              | 94  | 32 (31.9/27.7)  | 45 | 32 (31.1/26.7)           |
| Imipenem <sup>g</sup>            | 179 | 16 (1.7/13.4)               | 138 | 16 (0/NA)                   | 96 | 16 (3.1/15.6)               | 111 | 16 (0.9/9.0)    | 78 | 16 (1.3/NA)              |
| Levofloxacin                     | 179 | 16 (12.3/14.5)              | 139 | 16 (12.2/21.6)              | 97 | 16 (8.3/11.3)               | 111 | 16 (9.9/18.0)   | 78 | 16 (6.4/10.3)            |
| Meropenem                        | 179 | 32 (6.2/28.5)               | 139 | 32 (7.2/28.8)               | 97 | 32 (8.3/42.3)               | 111 | 32 (5.4/33.3)   | 78 | 32 (10.3/39.7)           |
| Piperacillin/tazobactam          | 179 | 256 (0/0)                   | 139 | 256 (1.4/1.4)               | 97 | 256 (0/0)                   | 111 | 256 (0/0)       | 78 | 256 (0/0)                |
| Tigecycline <sup>h,i,j</sup>     | 166 | 2 (95.8/75.0)               | 118 | 2 (93.2/100)                | 81 | 2 (92.6/85.7)               | 92  | 2 (92.4/100)    | 75 | 4 (88.0/100)             |
| <b>Latin America (N= 326)</b>    |     |                             |     |                             |    |                             |     |                 |    |                          |
| Aztreonam-avibactam <sup>c</sup> | 41  | 0.25 (100)                  | 75  | 0.25 (100)                  | 77 | 0.5 (100)                   | 85  | 0.25 (100)      | 38 | 0.25 (100)               |
| Aztreonam                        | 41  | 128 (22.0/22.0)             | 75  | 128 (41.3/41.3)             | 77 | 256 (23.4/23.4)             | 85  | 128 (22.4/22.4) | 38 | 256 (21.1/21.1)          |
| Amikacin                         | 41  | 128 (53.7/36.6)             | 76  | 128 (52.6/42.1)             | 78 | 128 (52.6/38.5)             | 89  | 128 (53.9/48.3) | 41 | 128 (61.0/58.5)          |
| Cefepime                         | 41  | 64 (0/2.4)                  | 76  | 64 (0/4.0)                  | 78 | 64 (0/1.3)                  | 89  | 64 (0/0)        | 41 | 64 (0/4.9)               |
| Ceftazidime                      | 41  | 256 (0/0)                   | 76  | 256 (0/0)                   | 78 | 256 (0/0)                   | 89  | 256 (0/0)       | 41 | 256 (0/0)                |
| Ceftazidime-avibactam            | 41  | 256 (0/0)                   | 75  | 256 (1.3/1.3)               | 77 | 256 (1.3/1.3)               | 85  | 256 (0/0)       | 38 | 256 (0/0)                |
| Ceftriaxone                      | 2   | NA <sup>d</sup> (0/0)       | 9   | NA <sup>d</sup> (0/0)       | 11 | 32 (0/0)                    | 16  | 64 (0/0)        | 8  | NA <sup>d</sup> (0/0)    |
| Ciprofloxacin                    | 39  | 8 (10.3/15.4)               | 67  | 8 (9.0/10.5)                | 67 | 8 (10.5/13.4)               | 73  | 8 (19.2/20.6)   | 33 | 8 (18.2/18.2)            |
| Colistin <sup>e,f</sup>          | 35  | 1 (NA/94.3)                 | 57  | 4 (NA/89.5)                 | 67 | 1 (NA/94.0)                 | 76  | 2 (NA/90.8)     | 34 | 4 (NA/88.2)              |
| Gentamicin                       | 39  | 32 (20.5/18.0)              | 67  | 32 (17.9/16.4)              | 67 | 32 (26.9/25.4)              | 73  | 32 (30.1/27.4)  | 33 | 32 (45.5/42.4)           |
| Imipenem <sup>g</sup>            | 41  | 16 (0/7.3)                  | 75  | 16 (1.3/NA)                 | 77 | 16 (0/9.1)                  | 85  | 16 (0/5.9)      | 38 | 16 (0/NA)                |
| Levofloxacin                     | 41  | 16 (24.4/43.9)              | 76  | 16 (14.5/30.3)              | 78 | 16 (21.8/43.6)              | 89  | 16 (24.7/40.5)  | 41 | 16 (26.8/43.9)           |
| Meropenem                        | 41  | 32 (7.3/26.8)               | 76  | 32 (4.0/31.6)               | 78 | 32 (1.3/20.5)               | 89  | 32 (1.1/28.1)   | 41 | 32 (2.4/29.3)            |
| Piperacillin/tazobactam          | 41  | 128 (2.4/2.4)               | 76  | 128 (1.3/1.3)               | 78 | 256 (0/0)                   | 89  | 256 (1.1/1.1)   | 41 | 256 (0/0)                |
| Tigecycline <sup>h,i,j</sup>     | 36  | 2 (91.7/100)                | 58  | 2 (96.6/80.0)               | 69 | 2 (97.1/90.9)               | 81  | 2 (91.4/100)    | 37 | 2 (100/100)              |
| <b>North America (N=22)</b>      |     |                             |     |                             |    |                             |     |                 |    |                          |
| Aztreonam-avibactam <sup>c</sup> | 7   | NA <sup>d</sup> (100)       | 6   | NA <sup>d</sup> (100)       | 5  | NA <sup>d</sup> (100)       | NA  | NA              | 3  | NA <sup>d</sup> (100)    |
| Aztreonam                        | 7   | NA <sup>d</sup> (14.3/14.3) | 6   | NA <sup>d</sup> (50.0/50.0) | 5  | NA <sup>d</sup> (60.0/60.0) | NA  | NA              | 3  | NA <sup>d</sup> (0/0)    |
| Amikacin                         | 7   | NA <sup>d</sup> (57.1/57.1) | 6   | NA <sup>d</sup> (66.7/66.7) | 5  | NA <sup>d</sup> (100/80.0)  | NA  | NA              | 3  | NA <sup>d</sup> (0/0)    |
| Cefepime                         | 7   | NA <sup>d</sup> (0/0)       | 6   | NA <sup>d</sup> (0/0)       | 5  | NA <sup>d</sup> (0/0)       | NA  | NA              | 3  | NA <sup>d</sup> (0/0)    |
| Ceftazidime                      | 7   | NA <sup>d</sup> (0/0)       | 6   | NA <sup>d</sup> (0/0)       | 5  | NA <sup>d</sup> (0/0)       | NA  | NA              | 3  | NA <sup>d</sup> (0/0)    |
| Ceftazidime-avibactam            | 7   | NA <sup>d</sup> (0/0)       | 6   | NA <sup>d</sup> (0/0)       | 5  | NA <sup>d</sup> (0/0)       | NA  | NA              | 3  | NA <sup>d</sup> (0/0)    |
| Ceftriaxone                      | NA  | NA                          | NA  | NA                          | 1  | NA <sup>d</sup> (0/0)       | NA  | NA              | NA | NA                       |
| Ciprofloxacin                    | 7   | NA <sup>d</sup> (14.3/28.6) | 6   | NA <sup>d</sup> (0/0)       | 4  | NA <sup>d</sup> (50.0/100)  | NA  | NA              | 3  | NA <sup>d</sup> (0/0)    |
| Colistin <sup>e,f</sup>          | 7   | NA <sup>d</sup> (NA/71.4)   | 5   | NA <sup>d</sup> (NA/100)    | 5  | NA <sup>d</sup> (NA/100)    | NA  | NA              | 3  | NA <sup>d</sup> (NA/100) |
| Gentamicin                       | 7   | NA <sup>d</sup> (0/0)       | 6   | NA <sup>d</sup> (0/0)       | 4  | NA <sup>d</sup> (100/100)   | NA  | NA              | 3  | NA <sup>d</sup> (0/0)    |
| Imipenem <sup>g</sup>            | 7   | NA <sup>d</sup> (0/0)       | 6   | NA <sup>d</sup> (0/16.7)    | 5  | NA <sup>d</sup> (0/40.0)    | NA  | NA              | 3  | NA <sup>d</sup> (0/0)    |
| Levofloxacin                     | 7   | NA <sup>d</sup> (28.6/42.9) | 6   | NA <sup>d</sup> (0/16.7)    | 5  | NA <sup>d</sup> (60.0/80.0) | NA  | NA              | 3  | NA <sup>d</sup> (0/0)    |
| Meropenem                        | 7   | NA <sup>d</sup> (0/28.6)    | 6   | NA <sup>d</sup> (0/33.3)    | 5  | NA <sup>d</sup> (0/100)     | NA  | NA              | 3  | NA <sup>d</sup> (0/33.3) |

|                              |   |                          |   |                           |   |                          |    |    |   |                         |
|------------------------------|---|--------------------------|---|---------------------------|---|--------------------------|----|----|---|-------------------------|
| Piperacillin/tazobactam      | 7 | NA <sup>d</sup> (0/0)    | 6 | NA <sup>d</sup> (0/0)     | 5 | NA <sup>d</sup> (0/0)    | NA | NA | 3 | NA <sup>d</sup> (0/0)   |
| Tigecycline <sup>h,i,j</sup> | 7 | NA <sup>d</sup> (100/NA) | 6 | NA <sup>d</sup> (83.3/NA) | 5 | NA <sup>d</sup> (100/NA) | NA | NA | 3 | NA <sup>d</sup> (100/0) |

<sup>a</sup> Not all drugs in the panel were tested every year. <sup>b</sup> Data includes percentage isolates susceptible at increased exposure. <sup>c</sup> No breakpoints available from CLSI and EUCAST. Values expressed are indicative of the cumulative percentage of isolates inhibited at  $\leq 8$  mg/L for comparison purposes. <sup>d</sup> The MIC<sub>90</sub> has been presented as NA considering the  $n < 10$ . <sup>e</sup> Susceptible category for colistin not available for CLSI breakpoints (only intermediate and resistant isolates are available). <sup>f</sup> Data for colistin do not include isolates of *Morganella morganii*, *Proteus hauseri*, *Proteus mirabilis*, *Proteus vulgaris*, *Providencia alcalifaciens*, *Providencia rettgeri*, *Providencia spp*, *Providencia stuartii*, and *Serratia marcescens*. <sup>g</sup> Data for imipenem not available per EUCAST. <sup>h</sup> Data for tigecycline do not include isolates of *Morganella morganii*, *Proteus hauseri*, *Proteus mirabilis*, *Proteus vulgaris*, *Providencia alcalifaciens*, *Providencia rettgeri*, *Providencia spp*, and *Providencia stuartii*. <sup>i</sup> Data for tigecycline was calculated based on FDA approved breakpoints for CLSI. <sup>j</sup> EUCAST data for susceptibility to tigecycline are limited to *E. coli* and *C. koseri*; denominator (n): AfME: RTI=NA, UTI=7, SSTI=8, BSI=2, IAI=2; APAC: RTI=29, UTI=66, SSTI=18, BSI=35, IAI=11; Europe: RTI=4, UTI=7, SSTI=7, BSI=2, IAI=5; LATAM: RTI=3, UTI=5, SSTI=11, BSI=8, IAI=4; North America: RTI=NA, UTI=NA, SSTI=NA, BSI=NA, IAI=1. BSI, blood-stream infections; IAI, intra-abdominal infection; MIC, minimum inhibitory concentration; N, total number of isolates; n, number of isolates from infection sources; NA, not available; RTI, respiratory tract infection; SSTI, skin and soft tissue infection; UTI, urinary tract infection.
